## **Absence of a faster-X effect in beetles (*Tribolium*, Coleoptera)**

Authors: Carrie A. Whittle<sup>1</sup>, Arpita Kulkarni<sup>1</sup>, Cassandra G. Extavour<sup>1,2\*</sup>

1. Department of Organismic and Evolutionary Biology, Harvard University, 16 Divinity Avenue, Cambridge MA 02138, USA

2. Department of Molecular and Cellular Biology, Harvard University, 16 Divinity Avenue, Cambridge MA 02138, USA

\*Corresponding Author: Cassandra G. Extavour, Email: [extavour@oeb.harvard.edu](mailto:extavour@oeb.harvard.edu)

1 **Abstract**

2 **Background.** The faster-X effect, namely the rapid evolution of protein-coding genes on the X-chromosome,  
3 has been reported in numerous metazoans. However, the prevalence of this phenomenon across metazoans and  
4 its potential causes remain largely unresolved. Analysis of sex-biased genes may elucidate its possible  
5 mechanisms: a more pronounced faster-X effect in male-biased genes than in female-biased or unbiased genes,  
6 suggests fixation of recessive beneficial mutations rather than genetic drift. Further, theory predicts that the  
7 faster-X effect should be promoted by X-chromosome dosage compensation, but this topic remains rarely  
8 empirically examined.

9  
0 **Results.** Here, we asked whether we could detect a faster-X effect in genes of the beetle *Tribolium castaneum*  
1 (and *T. freemani* orthologs), which has X/Y sex-determination and heterogametic males. Our comparison of  
2 protein sequence divergence (dN/dS) on the X-chromosome versus autosomes indicated the complete absence  
3 of a faster-X effect. Further, analyses of sex-biased gene expression revealed that the X-chromosome was  
4 strongly enriched for ovary-biased genes, which evolved under exceptionally high constraint. An evaluation of  
5 male X-chromosome dosage compensation in the gonads and in non-gonadal somatic tissues showed an  
6 extreme lack of compensation in the testis. This under-expression of the X chromosome in males may limit the  
7 phenotypic effect, and therefore likelihood of fixation, of recessive beneficial X-linked mutations in genes  
8 transcribed in male gonads.

9  
0 **Conclusions.** We show that these beetles display a rare unequivocal example of the absence of a faster-X effect  
1 in a metazoan. We propose two potential causes for this, namely high constraint on X-linked ovary-biased  
2 genes, and an extreme lack of dosage compensation of genes transcribed in the testis.

3  
4 **Keywords:** *Tribolium castaneum*, faster-X, sex-biased expression, dosage compensation, dN/dS  
5

## 26 **Background**

27           The “faster-X” effect, that is, the rapid evolution of protein-coding genes on the X  
28 chromosome, has been widely reported in a range of metazoan systems with sex chromosomes  
29 [1, 2]. Higher rates of protein divergence of genes on the hemizygous X-chromosome (faster-X,  
30 or faster-Z in W/Z systems) than on autosomes has been observed in organisms including  
31 primates [3, 4], humans [4], rodents [5], birds [6, 7], moths [8], aphids [9], and very recently in  
32 spiders [10]. In other organisms, however, a faster-X effect is more ambiguous. For example,  
33 signals of this effect have sometimes, but not always, been observed in studies of fruit flies [2,  
34 11, 12], and variable results on the presence or strength of the faster-X effect have been reported  
35 in butterflies [13, 14].

36           With regards to the mechanisms that might account for the faster-X effect, it has been  
37 proposed that X-linked genes might evolve faster in protein sequence than those on autosomes  
38 due to efficient fixation of recessive beneficial mutations in the hemizygous state, a notion that  
39 has found empirical support in some animal taxa [1, 2, 4, 5, 11, 15]. An alternative mechanism is  
40 that the effect results largely from fixation of recessive, mildly deleterious mutations via genetic  
41 drift. Studies of birds and aphids support this mechanism, which has been suggested to be  
42 facilitated by the lowered effective population size of the X chromosome [1, 7, 9, 16].

43           The study of sex-biased gene expression, that is, those genes preferentially upregulated in  
44 one sex, has helped to decipher the forces shaping the molecular evolutionary rates on the X-  
45 chromosome versus autosomes [17-20], and thus to better understand the faster-X effect [7, 8,  
46 12-16]. For instance, under a model wherein the faster-X effect is caused by rapid fixation of  
47 beneficial mutations in the hemizygous state, in organisms where males are the heterogametic  
48 sex, this effect is predicted to be strongest in male-biased genes, and relatively lower in female-  
49 biased and unbiased genes [16]. This prediction is based on the hypothesis that X-linked  
50 recessive beneficial mutations should largely exert their fitness effects in males, as their  
51 hemizygous state would preclude the possibility of non-mutant alleles masking the phenotypic  
52 effect of such recessive mutations [7, 15, 16]. Empirical support from this model comes from a  
53 study of *Drosophila*, in which assessment of protein divergence (dN/dS) of genes on the X-  
54 chromosome and autosomes, revealed a faster-X effect for all three classes of sex biased genes  
55 (male-biased, female-based and unbiased). In this study, protein sequence divergence was  
56 highest in male-biased genes and lowest in female-biased genes, empirically supporting a model

57 of fixation of beneficial mutations on the X chromosome [15, 16]. In chickens, which have WZ  
58 sex chromosomes and female heterogamy, elevated dN/dS has been reported across all studied  
59 genes on the Z-chromosome, consistent with the faster-X (or faster-Z in this case) effect [21].  
60 However, the prediction of higher dN/dS for female-biased genes on the Z-chromosome was not  
61 met in this study, suggesting that the faster-Z in these birds was not due to fixation of recessive  
62 beneficial mutations, and rather might be attributable to fixation of neutral or slightly deleterious  
63 mutations via genetic drift [7, 16]. Recently, similar results were reported for the W/Z  
64 chromosomes of *Heliconius* butterflies [14]. At present however, the study of the faster-X effect,  
65 including the role of sex-biased gene expression, remains limited to just a few model organisms,  
66 and the putative underlying mechanisms appear to be variable.

67 The faster-X effect may be expected to be most strongly observed in organisms with  
68 complete dosage compensation, wherein expression levels of X-linked genes are upregulated in  
69 the heterogametic sex, such that the X to autosome ratio (X:A) is one or close to one [1, 2, 22,  
70 23]. Under this hypothesis, in organisms with incomplete X-chromosome dosage compensation,  
71 such that  $X:A < 1$ , X-linked recessive beneficial mutations would have relatively low expression  
72 levels, and thus putatively weak phenotypic effects (or selection coefficients[1]), in the  
73 hemizygous sex. This could make beneficial mutations exposed on the single male X-  
74 chromosome unlikely to be fixed any more frequently than they would be if they were  
75 autosomal, possibly resulting in evolutionary rates of X-linked genes that are not significantly  
76 faster than those of autosomal genes [1, 7]. Support for the notion that dosage compensation may  
77 impact the rates of X- (or Z-) linked gene evolution is provided by the observation that certain  
78 butterflies display incomplete dosage compensation [24]; this correlates with, and thus may  
79 contribute towards, the observed lack of an elevated faster-Z effect in female-biased genes in  
80 those organisms [14, 24]. Similar patterns have been described in birds [7]. At present however,  
81 the relationship between faster-X effect and dosage compensation remains rarely empirically  
82 evaluated.

83 An important factor to consider in the study of dosage compensation, is that this  
84 phenomenon may vary among tissues within an organism. For instance, studies in *Drosophila*  
85 have shown that complete dosage compensation of X-linked genes is observed in male somatic  
86 tissues, but not in the testis [25-27]. In the context of these findings in *Drosophila*, it appears  
87 possible that the degree of gonadal and somatic dosage compensation could in theory [1]

88 influence its observed faster-X effect [2, 11, 12]. Thus, given that dosage compensation may  
89 vary among tissues, and particularly in the gonads, specific study is warranted of the faster-X  
90 effect and its association to gonadal and non-gonadal dosage compensation in animal models.

91 A model insect genus that offers new opportunities to study the faster-X effect is the  
92 beetle system *Tribolium* (Coleoptera). Coleoptera is the largest insect order, with recent  
93 estimates of over 1.5 million species, thus comprising approximately 40% of all arthropod  
94 species [28]. The rust red flour beetle *T. castaneum* is a well-established model system for  
95 genetics and for the evolution of developmental mechanisms [29-33], and has extensive genomic  
96 resources available for research [34-36]. In addition, its less well-studied sister species *T.*  
97 *freemani*, from which it diverged approximately 12-47 Mya, comprises a suitable system for  
98 comparative genomic study [37]. To date, however, to our knowledge the primary genome-wide  
99 sex-biased expression research in *Tribolium* that includes X-chromosome analyses consists of a  
100 foundational study based on whole male versus whole female contrasts and microarray data in *T.*  
101 *castaneum* [38]. That assessment made several significant findings, including that the female-  
102 biased genes were highly overrepresented on the X-chromosome [38], which was proposed to be  
103 explained by a mechanism of overexpression of X-linked genes in females as an imperfect  
104 response to male dosage compensation [38]. In addition, the study's authors reported that X-  
105 linked genes with male-biased expression were comparatively uncommon, a trend also observed  
106 in other organisms such as *Drosophila* [38]. In addition to that assessment, other transcriptome  
107 studies in *Tribolium* include a recent study using RNA-seq in *T. castaneum* that examined  
108 differential expression among somatic, germ line, and embryonic tissues [39]. The study reported  
109 identification of potentially useful transcripts and genes for generating genetic constructs for the  
110 investigation of development and pest control in this species [39]. A separate investigation of  
111 codon and amino acid usage was also conducted across the *T. castaneum* genome with respect to  
112 gene expression [35]. None of these studies, however, assessed evidence for or against the faster-  
113 X effect in *Tribolium*. Moreover, to our knowledge, there have been no between-species analyses  
114 of protein sequence divergence (dN/dS), and its potential relationship to sex-biased gene  
115 expression and dosage compensation. Thus, we considered that original analyses addressing  
116 these important topics in this beetle model could provide valuable insights into the breadth of the  
117 faster-X phenomenon across animals, and help decipher its underlying mechanisms.

118 Here, we describe a rigorous assessment of the faster-X effect in *T. castaneum*, including  
119 evaluation of its relationship to sex-biased gene expression and dosage compensation, using  
120 newly generated RNA-seq data from gonads and gonadectomized (GT-) males and females. Our  
121 assessment of dN/dS in 7,751 *T. castaneum* genes with high confidence orthologs in its sister  
122 taxon *T. freemani* reveals the complete absence of a faster-X effect in this taxon. Instead, we find  
123 a slower rate of evolution of X-linked as compared to autosomal genes. Further, we show that the  
124 faster-X effect is not found at any level for male-biased, female-biased or unbiased genes  
125 identified from the gonads and from non-gonadal somatic tissues. We demonstrate that the slow-  
126 X effect in this taxon is largely due to the slow sequence evolution of ovary-biased genes located  
127 on the X-chromosome, which are more common, and are more highly constrained, than those on  
128 autosomes. Moreover, with respect to dosage compensation, we report that GT-males exhibit  
129 high X-chromosome dosage compensation with an X/A ratio near one. However, an extreme  
130 absence of dosage compensation is evident for hemizygous X-linked genes expressed in the  
131 testis. We suggest that this may give rise to weak phenotypic effects of such genes [1],  
132 potentially limiting fixation of recessive beneficial mutations when transcribed in male gonads,  
133 thereby impeding a faster-X effect. Our results thus provide additional empirical support [7, 14]  
134 for a notion that has previously been proposed theoretically [1, 2, 7, 22]. Taken together, we  
135 propose that the unusual absence of a faster-X effect in these beetles may be influenced by two  
136 major phenomena: (1) the accumulation of highly constrained ovary-biased genes on the X-  
137 chromosome, and (2) the lack of dosage compensation in the male gonads, which may act to  
138 minimize fixation of recessive beneficial mutations of genes transcribed in these tissues.

139

## 140 **Results**

141 The complete list of previously annotated [36] protein-coding genes in our main target  
142 taxon *T. castaneum* were downloaded for study (N=16,434 genes, Ensembl Metazoa  
143 (<http://metazoa.ensembl.org>). Using the full CDS list (longest CDS per gene) we identified 7,751  
144 high confidence orthologs in its sister species *T. freemani* for our study of protein sequence  
145 evolution (dN/dS, see Methods; note that expression results for all 16,434 *T. castaneum* genes  
146 are described throughout when appropriate). The use of closely related sister species is a  
147 common approach to study the protein sequence divergence of sex-biased genes in metazoan  
148 models (*cf.* [6, 9, 15, 40-42]). Values of dN/dS <1, =1, and >1 suggest that purifying, neutral

149 and positive selection respectively are likely to predominantly shape the evolution of protein  
150 coding genes [43]. However, even when  $dN/dS < 1$  (as is typical in gene-wide analysis),  
151 relatively elevated values suggest reduced constraint, which could be due to relaxed selection  
152 and/or adaptive evolution. Under the faster-X effect,  $dN/dS$  is predicted to be elevated for  
153 protein-coding genes on the X-chromosome as compared to those on autosomes [7, 15, 16, 21].

154 We first assessed whether this beetle system exhibited a faster-X effect. Box plots of  
155  $dN/dS$  of genes located on the X-chromosome versus autosomes are shown in Fig. 1, showing no  
156 tendency for higher  $dN/dS$  in genes on the X chromosome. In fact, we observed the opposite:  
157  $dN/dS$  was statistically significantly lower for X-linked genes than for autosomal genes in this  
158 taxon (MWU-test  $P=0.002$ ). From a total of 432 studied X-linked genes and 7,319 autosomal  
159 genes distributed across nine autosomes, the median  $dN/dS$  values were 0.686 and 0.906  
160 respectively (Fig. 1A), yielding a ratio of  $dN/dS$  values for the X-chromosome to autosomes  
161 across all genes ( $X/A_{dN/dS}$  (all genes)) of 0.76 (Fig. 1B). Thus, the  $X/A_{dN/dS}$  (all genes) value is  
162 considerably below 1, a result opposite to the  $>1$  value expected under a faster-X effect [4, 14-  
163 16, 21]. Further, the mean  $dN/dS$  on the X-chromosome was about half (ratio of 0.54) that  
164 observed on autosomes (Fig. 1B). Thus, these results indicate the absence of a faster-X effect in  
165 this taxon, differing from that observed in most other metazoan systems studied to date.  
166 Together, these data show a slower-X pattern in *Tribolium*.

167

### 168 **Assessment of sex-biased genes on the X-chromosome versus autosomes**

169 Sex-biased gene expression has primarily been used to help discern the potential causes  
170 of the faster-X (or -Z) after it has been detected in an organism [7, 12-16]. Having observed no  
171 evidence of a faster-X effect for this beetle taxon, we asked if sex-differences in gene expression  
172 could help suggest mechanisms that might explain the absence of this effect (Fig. 1). We also  
173 wished to determine whether a faster-X effect was present for specific categories of sex-biased  
174 genes, including male-biased, female-biased and unbiased genes. For this assessment, we  
175 generated new large-scale RNA-seq datasets for adult male testes and ovaries, and for the  
176 gonadectomized bodies of adult males and females (hereafter referred to as GT-males and GT-  
177 females respectively, or non-gonadal somatic tissues) (Table S1). We mapped reads to annotated  
178 *T. castaneum* genes (See Methods), and identified sex-biased genes for the gonads (testis versus  
179 ovary) and for the GT-soma (GT-males versus GT-females) as those with a two-fold and



180 statistically significant difference ( $P < 0.05$ ) in expression using Deseq2 [44]. We found that  
181 25.8% of all genes in the genome ( $N = 16,434$ ) had gonad-biased expression ( $N = 4,242$ ), and 9.6%  
182 of genes ( $N = 1,573$ ) had biased expression in the GT-soma (shown in Fig. S1). The N values of  
183 sex-biased genes for those genes with orthologs ( $N = 7,751$ ) are shown in Fig. S2 ( $N = 2,341$   
184 (30.2%) and 836 (10.7%) for gonads and GT-soma respectively). We then assessed the sex-  
185 biased expression status of X-linked and autosomal genes with respect to dN/dS.

186 The proportion of genes on the X-chromosome and on each of the nine autosomes that  
187 had sex-biased or unbiased expression is shown in Fig. 2A, which includes all genes for which  
188 we had calculated dN/dS values ( $N = 7,751$ ) (see Fig. S3 for all annotated *T. castaneum* genes,  
189 which yielded similar patterns according to sex-biased expression status). We found that a  
190 disproportionately large fraction of genes on the X chromosome were ovary-biased: 53.9% of the  
191 X-linked genes under study were ovary-biased ( $N = 233$  of the 432 X-linked genes for which we  
192 assessed dN/dS) (Fig. 2A), while only 16.3% of autosomal genes showed ovary-biased  
193 expression ( $N = 1,192$  of 7,319 genes pooled across autosomes,  $\chi^2$  with Yate's correction  
194  $P < 0.0001$ ). In contrast, relatively few testis-biased, GT-male biased or GT-female biased genes  
195 were located on the X chromosome (each of these gene expression categories constituted  $\leq 5.5\%$   
196 of the X-linked genes under study in Fig. 2AB). These chromosomal distributions of the different  
197 sex-bias expression categories for this set of 7,751 genes with high confidence orthologs between  
198 *T. castaneum* and *T. freemani* (Fig. 2AB) largely parallels that observed for all *T. castaneum*  
199 genes in the genome (Fig. S3AB) and agrees with the aforementioned prior report for all *T.*  
200 *castaneum* genes [38]. That study compared whole males versus whole females, and showed that  
201 the X-chromosome contained a high abundance of female-biased genes and very few male-  
202 biased genes. Our results extends these results to explicitly show that ovary-biased genes (Fig.  
203 2A), rather than genes with female-biased expression in somatic tissues (Fig. 2B), are highly  
204 concentrated on the X-chromosome, and that X-linked testis-biased genes, GT-male-biased, and  
205 GT-female-biased genes are each relatively rarely observed on the X-chromosome.

206

### 207 ***The absence of a faster-X effect is largely caused by slow-evolving X-linked ovary-biased*** 208 ***genes***

209 Having identified that ovary-biased genes were highly overrepresented on the X  
210 chromosome relative to autosomes (Fig. 2A), we asked if this might contribute to the observed



211 slower-X effect. We compared dN/dS values for these ovary-biased genes on X-chromosomes to  
212 those values for autosomal ovary-biased genes (Fig. 2CE; N values in Table S2, Fig. S2). We  
213 found that the dN/dS values of X-linked ovary-biased genes were statistically significantly lower  
214 than dN/dS values for autosomal ovary-biased genes (MWU-test  $P < 0.001$ , Fig. 2C). Thus, the  
215 faster-X effect is absent in ovary-biased genes. Further, the ratio of the median dN/dS values  
216 when calculated using only the subset of X-linked ovary-biased genes versus those on  
217 autosomes,  $X/A_{dN/dS}(\text{ovary-biased})$ , was 0.74 (Fig. 2E), also suggesting higher selective constraint on  
218 ovary-biased genes on the X-chromosome than autosomes. Moreover, ovary-biased genes on the  
219 X-chromosome had lower dN/dS than unbiased genes on the X-chromosome and on autosomes  
220 (MWU-tests  $P < 0.001$ ) and markedly lower dN/dS values than testis-biased genes on the  
221 autosomes (two-fold lower, 0.060 versus 0.120 median dN/dS values, MWU-test  $P < 0.001$ ; note  
222 there were too few X-linked testis-biased genes for reliable testing). Together, given the high  
223 frequency of genes located on the X-chromosome that were ovary-biased (Fig. 2A), these  
224 findings indicate that constrained evolution of ovary-biased genes contributes to the global  
225 absence of a faster-X effect in this organism (Fig. 1).

226 For the genes with GT-soma-biased expression, there were only 24 genes with GT-  
227 female biased expression on the X-chromosome (as compared to 233 with ovary-biased  
228 expression on the X-chromosome). Nonetheless, as we had observed for ovary-biased genes, this  
229 small number of GT-female biased genes also had statistically significantly lower dN/dS values  
230 than the GT-female biased genes on autosomes (MWU-test  $P = 0.031$ , Fig. 2D), and the  $X/A_{dN/dS}$   
231 ( $_{GT-female}$ ) value when calculated for this subset of genes was also low, at 0.45 (Fig. 2F). Thus, it  
232 appears that there has also been high purifying selection on X-linked GT-female biased genes in  
233 this taxon. Upon close examination however, and as shown in Table S2, 17 of the 24 (70.8%) X-  
234 linked GT-female biased genes also had ovary-biased expression, suggesting that the observed  
235 effect could be due to purifying selection on ovarian expression rather than somatic expression.  
236 Nonetheless, the seven genes with GT-female biased but not ovary-biased expression yielded a  
237  $X/A_{dN/dS}(\text{GT-female})$  ratio of 0.32, indicating that X-linked GT-female-biased genes are under  
238 higher constraint than those on autosomes, regardless of their ovary-biased expression status.  
239 Thus, we find no evidence of a faster-X effect for any female-biased genes, regardless of gonadal  
240 or somatic expression, and in fact these genes likely contribute to the slow evolution of the X-  
241 chromosome.

242 We next assessed whether the faster-X effect was observable for male-biased genes  
243 (testis- or GT-male-biased), which would be expected to exhibit a pronounced faster-X effect  
244 under a hypothesis of rapid fixation of beneficial recessive mutations in the heterogametic sex [7,  
245 16]. We found that very few testis-biased genes or GT-male-biased genes were located on the X  
246 chromosome (N=9 and N=12 for testis-biased and GT-male-biased X-linked genes with high  
247 confidence interspecies orthologs), and that neither group of male-biased genes showed even  
248 mild evidence of a faster-X effect. The median dN/dS value was lower for these genes on the X  
249 chromosome than on autosomes for both categories of genes (Fig. 2CD). The  $X/A_{dN/dS}$  (testis-biased)  
250 ratio was 0.71 for testis-biased genes, and the  $X/A_{dN/dS}$  (GT-male biased) ratio was 0.52 for GT-male  
251 biased genes (Fig. 2EF), markedly below 1 in both cases. No overlap was observed between the  
252 testis-biased and GT-male biased gene sets (Table S2), and thus the low dN/dS effects were  
253 independently observed in each group. For stringency, we examined and noted that three of the  
254 GT-male-biased genes were also ovary-biased, but exclusion of those genes from the analysis  
255 still yielded an  $X/A_{dN/dS}$  (GT-male biased) ratio of 0.59, and thus the low dN/dS effect is directly linked  
256 to the GT-male-biased expression. In sum, while the small number of X-linked testis-biased and  
257 GT-male-biased genes precludes rigorous statistical testing of those genes, the patterns observed  
258 for these genes are inconsistent with a faster-X effect in male-biased genes, whether gonad- or  
259 soma-biased.

260 We next asked whether there was evidence for the faster-X effect in the gonadally  
261 unbiased genes. Given that such genes were common on all chromosomes (Fig. 2A, Table S2),  
262 which provides the potential for high statistical power, and that they by definition they exclude  
263 the highly constrained X-linked ovary-biased genes and the testis-biased genes described above  
264 (Fig. 2C), we predicted that if there were even a mild tendency for a faster-X effect in this taxon,  
265 it would be readily apparent in this group of genes. However, we found no significant difference  
266 in dN/dS values between X-linked and autosomal gonadally unbiased genes (MWU-test  $P > 0.05$   
267 Fig. 2C). Rather, we observed an  $X/A_{dN/dS}$  (gonadally unbiased) ratio of 1.04, indicating highly similar  
268 dN/dS between these two groups (Fig. 2E). In this regard, we conclude that the faster-X is fully  
269 absent in gonadally unbiased genes.

270 Finally, we assessed the GT-unbiased genes, and found evidence for greater constraint on  
271 the sequence evolution of these genes on the X chromosome as compared to autosomes ( $X/A_{dN/dS}$   
272 (GT-unbiased)=0.78, MWU-test  $P < 0.05$ , Fig. 2DF). As expected, however, given that a majority of

273 X-linked genes under study were ovary-biased (Fig. 2A, Table S2), and that most genes  
274 expressed in the GT-soma are not sex-biased (Fig. 2B), many of the X-linked GT-unbiased genes  
275 (N=396) were also ovary-biased (N=213). Excluding these genes, so that we could consider only  
276 those 183 GT-unbiased genes that were not ovary-biased, we found no differences in dN/dS  
277 values for these genes between the X-chromosome and autosomes (MWU-test  $P > 0.05$ ). In fact,  
278 the  $X/A_{dN/dS}$  (GT-unbiased) ratio for these GT- and ovary-unbiased genes was 1.04, identical to that  
279 observed for gonadally unbiased genes (Fig. 2EF). Thus, the GT-somatically unbiased genes,  
280 whether they were co-biased in the ovaries or not, exhibited no signals of a faster-X effect.

281 Taken together, the collective results in Fig. 2 show that the slower-X effect observed  
282 here in *Tribolium* is largely explained by highly constrained evolution of the abundant X-linked  
283 ovary-biased genes, with some minor contributions from the relatively smaller number of testis-  
284 biased, GT-male biased, and GT-female-biased genes (Fig. 2C-F). Crucially, the faster-X effect  
285 was not even observed in either gonadally-unbiased or GT-soma-unbiased genes, which each  
286 yielded an effective  $X/A_{dN/dS}$  ratio of 1.04. This latter finding cannot be explained by constrained  
287 evolution of X-linked sex-biased genes, suggesting that other factors likely also contribute  
288 towards the absence of the faster-X in this taxon (see the below section “*Absence of dosage*  
289 *compensation in the T. castaneum testis*”).

290

### 291 **Why do X-linked ovary-biased genes evolve slowly?**

292 We wished to further consider why the X-linked ovary-biased genes evolved extremely  
293 slowly (Fig. 2CE). The exceptionally low dN/dS values observed for ovary-biased genes on the  
294 X chromosome (Fig. 2CE) as compared to autosomes suggests that they could be essential genes  
295 subjected to high purifying selection, and their ovary-biased expression suggests that they may  
296 be involved in female reproduction and thus fitness. To examine this, we determined the  
297 predicted GO functions (see Methods: GO functions determined in DAVID [45]) of the ovary-  
298 biased genes located on the X-chromosome (Fig. 2A). Indeed, in agreement with this hypothesis,  
299 we found that ovary-biased genes on the X chromosome were enriched for genes involved in  
300 ovarian follicle development and *wnt* signalling (Table 1), which is crucial for ovarian  
301 development and function in multiple animals (see [46-55] for examples). X-linked ovary-biased  
302 genes also included those with predicted roles in female meiosis and oocyte function (Table 1).  
303 These essential ovarian roles were not among the top functional categories observed for ovary-

304 biased genes on autosomes (Table 1). Given these results, we suggest that high purifying  
305 selection on ovary-biased genes on the X chromosome is likely at least partly due to the  
306 important female reproductive roles of some of these genes. Moreover, their high concentration  
307 on the X-chromosome may suggest a history of preferential translocation of essential female  
308 reproductive genes to the X-chromosome.

309 We next considered whether expression breadth could explain the slow evolution of X-  
310 linked ovary-biased genes. It has been proposed that greater expression breadth across tissues,  
311 which reflects pleiotropic functionality, constrains dN/dS. For example, the rapid evolution of  
312 male-biased than female-biased genes observed in various organisms, as was also found here for  
313 testis versus ovaries (MWU-test  $P < 0.001$  of all testis- versus all ovary-biased genes, Fig. 2C)  
314 may result from low pleiotropy [17, 40, 56, 57]. Indeed, we found herein that expression breadth  
315 across the four studied tissue-types was lower for testis-biased than for ovary-biased genes.  
316 Specifically, only 25.5% of testis-biased genes (pooled for X-linked and autosomal) were  
317 expressed in all four tissue types (at  $>1$ FKPM) while 72.8% of ovary-biased genes were  
318 transcribed in all four tissues. In this regard, ovary-biased genes as a group exhibit higher  
319 pleiotropy, suggesting potential roles across various tissues that may contribute to their slower  
320 evolution relative to testis-biased genes (Fig. 2C). In turn, the accumulation of ovary-biased  
321 genes on the X-chromosome would act to constrain evolution of this chromosome.

322 Nonetheless, it is worth noting that broad expression breadth (expressed in in all four  
323 tissues) was observed for the majority of ovary-biased genes independently of chromosomal  
324 location (78.9% of X-linked ovary-biased genes and 71.6% of autosomal ovary-biased genes  
325 were expressed in all tissues). Thus, the specific finding of a lower dN/dS values of X-linked  
326 ovary-biased genes (compared to their counterparts on autosomes, Fig. 2C) cannot be fully  
327 explained by high pleiotropy. We therefore propose that the slower evolution of ovary-biased  
328 genes on the X-chromosome than those on autosomes is likely at least partly due to their  
329 preferential involvement in essential ovary functions (Table 1).

330

### 331 **Absence of dosage compensation in the *T. castaneum* testis**

332 In X/Y sex determination systems, it has been posited that mechanisms should exist to  
333 ensure that the expression levels of genes on the X-chromosome (X) and autosomes (A) would  
334 be approximately equivalent in both males (with hemizygous X) and females (homozygous X),

335 such that the ratio of expression of X/A in each sex should equal one [38, 58]. In turn, it may be  
336 expected that  $X_{\text{male}}/X_{\text{female}} = A_{\text{male}}/A_{\text{female}} = 1$  [38]. Measurements of gene expression levels in a  
337 number of animals have shown that mechanisms for acquiring elevated expression on the single  
338 male X-chromosome, or dosage compensation, are highly variable and that full dosage  
339 compensation is sometimes, but not always, achieved [38, 58-60]. In one prior study of gene  
340 expression using microarrays of whole males versus whole females in *T. castaneum* [38], it was  
341 reported that males exhibited full X-chromosome dosage compensation, with  $X_{\text{male}}/A_{\text{male}} = 1.0$   
342 and that females exhibited overexpression of the X chromosome, with  $X_{\text{female}}/A_{\text{female}} = 1.5$ ,  
343 thereby yielding  $X_{\text{male}}/X_{\text{female}}=0.79$  and  $A_{\text{male}}/A_{\text{female}}=1$ . Those results were interpreted as  
344 evidence that the genes on the X-chromosome exhibited complete dosage compensation in males  
345 (meaning that expression of the hemizygous X linked genes was equalized to expression of  
346 autosomal genes in males), and were overexpressed in females as an imperfect response to  
347 dosage compensation [38]. However, a recent study that examined published RNA-seq data for  
348 somatic glandular tissues in *T. castaneum* did not find evidence for hypertranscription of the X-  
349 chromosome in females [60]. Given that dosage compensation can vary among tissues in insects,  
350 particularly its absence in the testis of *Drosophila* [25-27], and that complete dosage  
351 compensation has been theorized to promote the faster-X effect by fixation of recessive  
352 beneficial mutations in hemizygous males [1, 2, 22], we next aimed to assess dosage  
353 compensation separately for genes expressed in the gonads and those expressed in the GT-  
354 somatic tissues for *T. castaneum*. As the sex organs play central roles in reproduction, recessive  
355 beneficial mutations in genes are apt to have their greatest fitness consequences (and thus be  
356 fixed) in the hemizygous male gonad (rather than male soma), and thus we predicted that if a  
357 lack of dosage compensation were found in the testis, this might significantly contribute towards  
358 the absent faster-X in this organism.

359 In Fig. 3, we show the median expression level (FPKM) for genes on the X-chromosome  
360 and each of the nine *T. castaneum* autosomes for the gonads (A) and for the GT-soma (B) using  
361 all genes that had high-confidence *T. freemani* orthologs (N=7,751; results for all *T. castaneum*  
362 genes are in Fig. S4, showing similar patterns). We report that expression levels in ovaries (Ov)  
363 were largely similar across the nine autosomes (median 14.7 FPKM across nine autosomal  
364 medians) and were relatively elevated on the X-chromosome (18.8 FPKM, MWU-test P=0.023  
365 of the X-chromosome versus autosomes, Fig. 3A; note that X/A is measured using multiple

366 decimal places), yielding  $X_{OV}/A_{OV}$  of 1.26 and is consistent with overexpression of X-linked  
367 genes in the ovary. For the testis (Ts), however, while expression was also largely similar across  
368 all nine autosomes (median 7.9 FPKM across nine autosomal medians), a strikingly lower  
369 expression level was observed for the X-chromosome (3.2 FPKM, Fig. 3A), giving an  $X_{Ts}/A_{Ts}$   
370 value of 0.41. Thus, there is 2.5-fold lower expression of X-linked testis genes than of autosomal  
371 testis genes (MWU-test  $P < 0.001$ , Fig 3A; see also Fig. S4A where the value was also  $< 0.5$ ),  
372 inconsistent with hypertranscription of the single X chromosome in males, at least for the testis-  
373 expressed genes. This complete absence of dosage compensation in the *T. castaneum* testis is  
374 even beyond that reported for the testis of *Drosophila*, which had an 0.65 value for this  
375 parameter [25]. Further, the low value potentially not only suggests an absence of  
376 hyperexpression on the X-chromosome in the hemizygous state (to balance autosomes), but  
377 could also be consistent with an active mechanism of suppression of X-linked expression [25, 27,  
378 61] in this beetle.

379 Moreover, we found that testis expression was lower than ovary expression across all  
380 nine autosomes, such that  $A_{Ts}/A_{OV}$  was equal to 0.53 (MWU-test  $P < 0.001$  of autosomal testis to  
381 ovary expression), differing from the equal male/female expression typically expected on  
382 autosomes [25, 38]. This effect was even more pronounced for the X-chromosome, where  
383  $X_{Ts}/X_{OV}$  had a value of 0.17 (Fig. 3A, MWU-test  $P < 0.001$  for X-chromosome testis expression  
384 versus ovary expression), indicating that even after taking into account the lower expression  
385 level observed on all autosomes for testis genes versus ovary genes (median 1.9 fold), testis  
386 genes exhibited a marked drop (5.9-fold) in expression on the X-chromosome. In this regard,  
387 both  $X_{Ts}/A_{Ts}$  and  $X_{Ts}/X_{OV}$  (Fig. 3A) suggest a complete absence of dosage compensation in this  
388 beetle.

389 Considering the GT-soma, we observed nearly perfect dosage compensation on the X-  
390 chromosome for GT-males, both with respect to GT-female expression levels, such that  $X_{GT-}$   
391  $_{female}/X_{GT-male} = 0.93$  (median of 3.02 and 3.25 FPKM respectively MWU-test  $P = 0.74$ ), and with  
392 respect to autosomal GT-male expression levels, with  $X_{GT-male}/A_{GT-male} = 0.91$  (MWU-test  
393  $P = 0.11$ ). Thus, unlike genes expressed in the testis, genes expressed in the non-gonadal tissues of  
394 males (GT-males) exhibited high dosage compensation (Fig. 3B, Fig. S4B). The median GT-  
395 male expression across all nine autosomes was consistently higher than the median expression in  
396 GT-females, yielding  $A_{GT-male}/A_{GT-female}$  of 1.27 (MWU-test  $P < 0.001$ ), a trend opposite to the



397 higher expression level observed for ovary genes relative to testis genes (Fig. 3AB). Nonetheless,  
398 GT-female genes on the X-chromosome were expressed at higher levels than such genes on  
399 autosomes, yielding  $X_{GT-female}/A_{GT-female}=1.26$  (MWU-test  $P=0.064$ ), and thus contributing to the  
400 observed highly similar expression levels between GT-females and GT-males on the X-  
401 chromosome. In sum, the GT-males show evidence of nearly complete dosage compensation,  
402 differing markedly from its complete absence in the testis. Additional study of more individual  
403 somatic tissues (e.g., brain, hindgut), similar to that in other recent studies [25, 60], will be  
404 needed to assess whether the variation in GT-female expression among autosomes is observed in  
405 various somatic tissue types in *T. castaneum*.

406 Taken together, the results presented here in Fig. 3 and Fig. S4 show a complete lack of  
407 dosage compensation in the testis. Given that the faster-X effect may be anticipated to be  
408 strongest in taxon groups with complete dosage compensation, due to elevated phenotypic  
409 protein product and effects of beneficial recessive mutations in males [1, 14, 22], the under-  
410 transcription in the *Tribolium* testis could contribute to the absence of the faster-X we report here  
411 (Fig. 1, Fig. 2). Further, this effect may transcend all sex-biased expression categories. For  
412 instance, all X-linked testis-biased genes, 98.7% ovary-biased genes, and 92.3% of gonadally  
413 unbiased genes were expressed in the testis, and thus low dosage compensation may affect all  
414 groups of genes due to under-expression (relative to autosomal genes) on the single X-  
415 chromosome in males. Finally, it should be noted that the absence of X-chromosome dosage  
416 compensation found in the testis, combined with a relatively modest elevation in ovary  
417 expression (Fig. 3A), are consistent with the concentration of ovary-biased genes on the X  
418 chromosome in this organism (Fig. 2AB, Fig.S3AB).

419

## 420 **Discussion**

421

### 422 **Absence of a faster-X effect and sex-biased genes**

423 Our results show that the absence of a faster-X effect, and tendency for a slower-X, in  
424 *Tribolium* (Fig. 1), is explained in part by strong purifying selection on the highly abundant X-  
425 linked ovary-biased genes (Fig. 2ACE). Accordingly, we hypothesize that many X-linked ovary-  
426 biased genes play essential roles in this organism, as indicated by their low dN/dS values (Fig.  
427 2CE), GO functional analysis (Table 1) and high cross-tissue pleiotropy (72.8% expressed in all



428 four tissues). We further hypothesize that ovary-biased genes may have been preferentially  
429 translocated to the X-chromosome over the history of this beetle taxon. This type of localization,  
430 or translocation, phenomenon is also supported by findings from other systems (e.g. mice,  
431 humans, flies) showing that genes involved in sex and sexual dimorphism, and particularly those  
432 showing female-biased expression, have been preferentially localized to the X-chromosome [62-  
433 65]. The preferential transfer of female genes (as compared to male-biased genes) to the X-  
434 chromosome may be facilitated by the unique selection pressures experienced by these  
435 chromosomes, especially the fact that two-thirds of X-chromosomes in population are carried by  
436 females and only one third in males, which may make the concentration of female functional  
437 genes on the X-chromosome an innate benefit to females [18, 61, 65].

438 For the testis-biased and GT-male biased genes, of which there were very few on the X-  
439 chromosome (Fig. 2AB, Fig. S3AB), the low  $dN/dS$  observed on the X-chromosome  
440 ( $X/A_{dN/dS}=0.71$  and  $0.52$  respectively) is also discordant with a faster-X effect in those genes.  
441 The constraint on X-linked male-biased genes could be readily explained by the immediate  
442 exposure of any mildly deleterious recessive mutations to purifying selection in the hemizygous  
443 state in testis and GT-males (and not on autosomes). Thus, it is possible that a much different  
444 mechanism could cause the slow evolution of those genes, than that operating on ovary-biased  
445 genes. In other words, it may be surmised that if most protein sequence evolution is due to  
446 fixation of weakly deleterious alleles in beetles, then the X-chromosome would be expected to  
447 evolve slowly due to rapid purging of these mutations as a result of hemizygous exposure, as  
448 compared to autosomes. This phenomenon was theorized to occur for some organisms under the  
449 original faster-X hypothesis [1] and has been proposed to contribute to the relatively mild faster-  
450 X effect observed in *Drosophila* (by countering the accelerated evolutionary rates on the X due  
451 to rapid fixation of recessive beneficial mutations) [22]. In Satyrine butterflies with W/Z  
452 systems, for example, it was suggested that slow evolution of Z-linked female-biased genes  
453 occurred due to high purifying selection on the Z-chromosome in the hemizygous state [13].  
454 Thus, the same phenomenon may occur for male-biased genes in *Tribolium*.

455 Importantly, the unbiased genes in the gonads, and in the GT-somatic tissues, showed no  
456 tendency for a faster-X effect, with  $X/A_{dN/dS}(\text{unbiased})=1.04$  for each tissue type (after exclusion of  
457 ovary-biased genes from the latter dataset, see Results, Fig. 2C-F). Thus, the lack of faster-X  
458 effect in those genes cannot be explained by higher selective constraint on the X-chromosome

459 than autosomes. Albeit, we do not exclude some purging of recessive mutations in males could  
460 occur in these genes, similar as proposed possible for male-biased genes above, however this  
461 would be expected to slow the X [1], which was not observed for unbiased genes. The result  
462 indicates that another mechanism likely contributes to the absence of a faster-X effect in these  
463 beetles, which our data strongly suggest involves the lack of dosage compensation in the male  
464 gonads.

465

### 466 **Lack of dosage compensation**

467 Our finding of a complete absence of dosage compensation combined with the absence of  
468 the faster-X effect is highly suggestive that fixation of beneficial sequence mutations on the X-  
469 chromosome may have been uncommon or absent in this taxon due to under-expression in males  
470 [1, 22]. Additional findings of an absent faster-X effect in a broader range of organisms, and that  
471 include assessments of the degree of dosage compensation, will help further resolve the role of  
472 this putative mechanism. Our results suggest the effect may extend beyond the passive absence  
473 of dosage compensation (or hyperexpression of the X-chromosome), and potentially reflects an  
474 active mechanism of X-chromosome silencing. Recent reports from *Drosophila* have also shown  
475 that dosage compensation is absent for the testis [25], and that this insect exhibits active  
476 suppression of X-linked expression in males [25, 61]. Consistently, it was found that the transfer  
477 of X-linked testis-expressed genes to the autosomes resulted in marked upregulation in *D.*  
478 *melanogaster* [61], suggesting an active mechanism of suppression of expression on the X-  
479 chromosome in testis. While the mechanism for X-linked active suppression of expression is  
480 unknown, it could reflect male meiotic sex chromosome inactivation (MSCI). Empirical support  
481 for MSCI has been observed for *D. melanogaster* [27, 66], and a strong effect has been found in  
482 range of other animal systems including mammals [67] and *Caenorhabditis elegans* [68]. Further  
483 study will be needed to ascertain whether the absence of dosage compensation in the testes for *T.*  
484 *castaneum* involves lack of upregulation on the X-chromosome and/or also includes an active  
485 process involving X-chromosome suppression or silencing.

486 We emphasize that the separation of gonads and GT-somatic tissues herein for expression  
487 analyses was essential for revealing the absence of dosage compensation in *T. castaneum*. A  
488 prior report of dosage compensation in *T. castaneum* using microarray expression data from  
489 whole males and females [38] showed much different results for male dosage compensation than

490 those observed in the present study. In that assessment, males were reported to exhibit complete  
491 dosage compensation on the single X-chromosome as compared to autosomes, while females  
492 were reported as exhibiting overexpression of X-chromosomes (relative both to X-linked  
493 transcription in males and to female expression on autosomes) [38]. The latter was interpreted as  
494 an imperfect (female) response to male dosage compensation [38]. In contrast, our tissue-specific  
495 expression data allow us to explicitly show the absence of dosage compensation in the male  
496 testis, and nearly perfect dosage compensation for X-linked GT-male expression with respect to  
497 the autosomes and with respect to X-linked expression in GT-females. Thus, our separation of  
498 gonadal from somatic expression data was essential for the detection of key differences in dosage  
499 compensation in this taxon, and was particularly crucial to discerning the absence of dosage  
500 compensation in the testis (Fig. 3A, Fig. S4A), that had been obscured previously in the  
501 examination of whole males and females.

502 Finally, while we propose that the absence of the faster-X effect herein is best explained  
503 by constrained evolution of the abundant X-linked ovary-biased genes and lack of dosage  
504 compensation in the testis, we do not exclude a role of standing genetic variation. For instance,  
505 large populations tend to contain more polymorphic loci, which can accelerate autosome  
506 evolution if adaptation occurs via standing genetic variation rather than *de novo* mutations [2,  
507 69]. This phenomenon could possibly occur in beetles, and thus we do not exclude this factor in  
508 partly contributing towards the absence of a faster-X effect in this taxon.

509

## 510 **Conclusions and Future Directions**

511 We have shown the complete absence of the faster-X effect in a *Tribolium* system, which  
512 our data strongly suggest is largely explained by constrained evolution of X-linked ovary-biased  
513 genes and the extreme absence of dosage compensation in the testis of this taxon. Future studies  
514 should aim to study additional genomes of more *Tribolium* species, which would allow tests of  
515 positive selection in protein sequences on the X-chromosome and autosomes [43]. In addition,  
516 studies using population-level data from *T. castaneum* will allow tests of polymorphism versus  
517 divergence, which comprises an alternate method to test adaptive evolution expected under the  
518 faster-X effect [13, 14]. A further understanding of dosage compensation in this taxon may be  
519 achieved by attainment of transcriptional data from a wide range of individual somatic tissue  
520 types in *T. castaneum*, similar to analyses recently conducted in *Drosophila* [25]. Such multi-

521 tissue expression data will also allow further assessments of cross-tissue pleiotropy of sex-biased  
522 genes [40, 57, 70] and may help further disentangle its role in constraining evolution of ovary-  
523 biased genes (Fig. 2).

524 Moreover, experimental research of MSCI in *T. castaneum*, as has been conducted in  
525 other organisms [66, 67, 71], will help reveal whether the lack of dosage compensation observed  
526 in the testis is due to transcriptional silencing in the male meiotic cells. In addition, studies using  
527 X-linked genes inserted into the autosomes, and vice-versa [25, 61, 68] may help discern the  
528 dynamics of dosage compensation in *T. castaneum*. Finally, studies of the faster-X effect,  
529 including analyses of sex-biased genes and dosage compensation, should be extended to include  
530 more understudied organisms, to help reveal the breadth of this phenomenon in metazoans and to  
531 better understand its underlying mechanisms.

532

## 533 **Methods**

### 534 **Biological Samples and RNA-seq**

535 *T. castaneum* and *T. freemani* specimens were provided by the Brown lab at Kansas State  
536 University (strain IDs; <https://www.k-state.edu/biology/people/tenure/brown/>). Samples were  
537 grown under standard laboratory conditions until adulthood as previously described [29].  
538 Additionally, to ensure that all adult animals for both species remained unmated until the time of  
539 tissue dissection, all animals were separated as late stage larvae into individual vials containing  
540 flour and allowed to pupate into adults. Tissue dissections were then performed on unmated  
541 adults within a week after they emerged from the molt. For *T. castaneum* a total of 150 animals  
542 per sex per biological replicate were sampled, whereas for *T. freemani*, a total of 50 males and  
543 females were collected per sample. For each sample of males and of females, the gonadal and  
544 nongonadal tissues were separated and placed into two separate vials containing TRIzol reagent  
545 (Ambion Life Technologies, catalog number 15596-018) on dry ice. Technical details on tissue  
546 collection, PCR, and RNA-seq are provided in Additional File 1, Text File S1.

547 For males, the isolated reproductive tissues included the testes, accessory glands  
548 (mesadenia, ectadenia), and directly attached tissues (vesicular seminalis, vas deferens and  
549 ejaculatory duct) whilst for females, gonad samples included the ovaries and their linked tissues  
550 (spermathecal gland, common oviduct, spermathecae, and vagina). For simplicity, we refer to the  
551 male and female reproductive organs and tissues collectively as “testis” and “ovary” or the sex-

552 neutral “gonads” herein, with the understanding that they include the abovementioned  
553 reproductive tissues directly linked to the respective gonads. All remaining non-gonadal tissues  
554 of the adult body are referred to as the gonadectomized (GT-) soma, or GT-males and GT-  
555 females. For the sister species *T. freemani*, four RNA-seq samples, one per tissue-type, testes,  
556 ovaries, GT-males and GT-females, were obtained and used for refining the CDS list for this  
557 species (see Methods) that was employed to assess protein divergence (dN/dS).

558

### 559 **CDS per Species and Defining Orthologs**

560 The annotated CDS of our main target species *T. castaneum* (v.5.2) were downloaded  
561 from Ensembl Metazoa (<http://metazoa.ensembl.org>) and are also available at BeetleBase [34,  
562 36]). The full CDS per gene (longest CDS per gene) was used for the study of sex-biased gene  
563 expression.

564 For the genome of *T. freemani*, which we used as a reference to determine dN/dS, CDS  
565 have not yet been annotated and thus were extracted from available scaffolds. The scaffold  
566 assembly was downloaded from BeetleBase (version 4, <http://www.Beetlebase.org>, [34]). Details  
567 on extracting the CDS for *T. freemani* are provided in Additional File 1, Text File S1.

568 In the final CDS list for *T. castaneum* and for *T. freemani*, only those CDS having a start  
569 codon, not having unknown or ambiguous nucleotides or internal stop codons, and  $\geq 33$  amino  
570 acids were retained for study. The total number of CDS after filtering was 16,434 for *T.*  
571 *castaneum*, marginally more than the 16,404 gene models first defined for this species [36], and  
572 was 12,628 for the sister species *T. freemani*. The average GC content of the *T. castaneum*  
573 protein-coding genes was 46.1% ( $\pm 5 \times 10^{-4}$ ), which is above the 33% reported for the global  
574 genome encompassing all coding and noncoding DNA as has been noted previously for this  
575 taxon [35, 36].

576

### 577 **Identification of Sex-Biased Genes**

578 The RNA-seq reads (76bp) per sample were trimmed of adapters and poor-quality bases  
579 using the program BBduk available from the Joint Genome Institute ([https://jgi.doe.gov/data-  
580 and-tools/bbtools/](https://jgi.doe.gov/data-and-tools/bbtools/)) and run as a plug-in in Geneious v11.0.3 using default parameters.

581 Gene expression level per gene was determined by mapping each RNA-seq dataset per  
582 tissue to the full CDS list for each species using Geneious Read Mapper, a program based our

583 comparisons and other analyses provides similar read match performance as other common read-  
584 mappers such as Bowtie [72] or Bbmap (<https://jgi.doe.gov/>; data not shown). Read counts per  
585 CDS were converted to FPKM for each gene. Expression level was compared separately for the  
586 gonads and for the GT-soma. Expression was compared between the testes and ovaries, and  
587 between GT-males and GT-females by using Deseq2 to obtain P-values [44] and the average  
588 FPKM of the replicates per tissue type (Table S1). Any gene having at least a two-fold difference  
589 in average expression and a statistically significant P-value ( $P < 0.05$ ) as well as a FPKM of at  
590 least one in one tissue type was identified as sex-biased [17, 73]. All other genes with nonzero  
591 expression in gonadal and in nongonadal contrasts were defined as unbiased.

592

### 593 **Ortholog Identification and Sequence Divergence**

594 For dN/dS analysis, orthologs between *T. castaneum* and *T. freemani* were identified  
595 using reciprocal BLASTX of the full CDS list between species in the program BLAST+ v2.7.1  
596 (<https://blast.ncbi.nlm.nih.gov>). Only genes having the same best match in both forward and  
597 reverse contrasts and an e-value  $< 10^{-6}$  were defined as orthologs. In the rare cases when two  
598 CDS had the same e-value, the one with the highest bit score was taken as the best match. For  
599 additional stringency of genes used for the study of dN/dS, only those genes that were reciprocal  
600 BLASTX best matches and where both dN and dS values of alignments ( $\geq 33$  amino acids) had  
601 values  $< 1.5$ , and thus were unsaturated in substitution (see below paragraph), were defined as  
602 orthologs between *T. castaneum* and *T. freemani* (and used for dN/dS analyses). Thus, the  
603 alignments and dN/dS measures herein are conservative.

604 Orthologous gene sequences in *T. freemani* and *T. castaneum* were aligned by codon  
605 using MUSCLE set to default parameters (except the gap penalty which was set at -1.9) in the  
606 program Mega-CC v7 [74]. Alignments were then filtered to remove gaps. It has been found that  
607 removal of highly divergent segments from alignments, despite some loss of sequence regions,  
608 improves measures of protein divergence; thus, highly divergent segments were removed using  
609 the program Gblocks v. 0.91b set at default parameters [75, 76]. Each gene alignment was then  
610 run in yn00 of PAML, which accounts for codon usage biases [43], to measure dN, dS, and  
611 dN/dS [43].

612 We note that the percentage of ovary-biased genes on the X-chromosome in our 7,751 *T.*  
613 *castaneum* genes with orthologs in *T. freemani* was 53.9%, while for all 16,434 *T. castaneum*



614 genes it was 42.2%. This likely reflects the fact that we studied genes that had high confidence  
615 orthologs between species, which are apt to be more frequently identified for ovary-biased genes  
616 due to their slowed evolution (Fig. 2C), an effect that was pronounced on the X-chromosome  
617 (Fig. 2C). Ovary-biased genes on autosomes had largely similar percentages on autosomes in the  
618 studied genes for dN/dS analyses and all genes (Fig. 2A, Fig. S3A). In this regard, our dN/dS  
619 analyses inherently include those genes with conserved between-species orthologs.

620

### 621 **X-Chromosomes Versus Autosomes**

622 Chromosomal locations of genes are available in the annotation for *T. castaneum*  
623 (<http://metazoa.ensembl.org>, also available at BeetleBase [34, 36]). We note that the Y-  
624 chromosome of *T. castaneum* is small (<5MB), highly degenerate, contains few if any protein-  
625 coding genes, and is not included in the genetic linkage map; accordingly it was not studied [29,  
626 36, 38, 77].

627

### 628 **Gene Ontology**

629 Gene ontology (GO) was assessed using DAVID software [45]. For this, we identified  
630 orthologs to *T. castaneum* in the reference insect model *D. melanogaster* (CDS v6.24 available  
631 from [www.flybase.org](http://www.flybase.org) [78]) using BLASTX (<https://blast.ncbi.nlm.nih.gov>) to identify the best  
632 match (lowest e-value with cut off of  $e < 10^{-6}$ ). *D. melanogaster* gene identifiers, which are  
633 accepted as input into DAVID, were used to obtain GO functions for *T. castaneum* genes. Single  
634 direction BLASTX with *T. castaneum* CDS as the query to the *D. melanogaster* database was  
635 used for this assessment (unlike for the reciprocal BLASTX between *Tribolium* species), as we  
636 considered reciprocal BLASTX to be overly stringent between these divergent insects (which are  
637 from different orders) for functional analysis.

638

### 639 **Availability of Data**

640 The CDS v. 5.2 for *T. castaneum* are available at Ensembl Metazoa  
641 (<http://metazoa.ensembl.org>). Scaffolds for *T. freemani* are available at BeetleBase [34, 36].  
642 RNA-seq data and SRA Biosample identifiers for all 12 samples from *T. castaneum* and *T.*  
643 *freemani* described in Table S1 are available at the SRA database under Bioproject accession  
644 number PRJNA564136.



645

## 646 **Declarations**

647 *Ethics approval and consent to participate:* N/A

648 *Consent for publication* N/A

649 *Availability of data and material:* Available at the SRA database under Bioproject accession  
650 number PRJNA564136. See also Table S1 for SRA Biosample identifiers for each sample  
651 studied herein.

652 *Competing interests:* None

653 *Funding:* Harvard University

654 *Authors' contributions:* CAW, AK, and CGE designed the study, CAW conducted data analyses,  
655 AK conducted lab procedures, all authors contributed to, read and approved the final manuscript.

656 *Acknowledgments:* This work was supported by funds from Harvard University. The authors  
657 thank Prof. Sue Brown at KSU for generously providing samples of *T. castaneum* and *T.*  
658 *freemani* for this study. We also thank members of the Extavour lab, Dr. Katharina Hoff at the  
659 University of Greifswald for updating the Augustus database used for *T. freemani* at our request,  
660 and the Bauer core sequencing facility at Harvard for generating RNA-seq data.

661

## 662 **Additional Files:**

663 Additional File 1: contains the supplemental tables, figures and SI Text including detailed  
664 methods.

665

## 666 **References**

667 1. Charlesworth B, Coyne JA, NH B: **The relative rates of evolution of sex chromosomes**  
668 **and autosomes.** *Am Nat* 1987, **130**:113.

669 2. Meisel RP, Connallon T: **The faster-X effect: integrating theory and data.** *Trends*  
670 *Genet* 2013, **29**:537-544.

671 3. Stevenson BJ, Iseli C, Panji S, Zahn-Zabal M, Hide W, Old LJ, Simpson AJ, Jongeneel  
672 CV: **Rapid evolution of cancer/testis genes on the X chromosome.** *BMC Genomics*  
673 2007, **8**:129.

674 4. Lu J, Wu CI: **Weak selection revealed by the whole-genome comparison of the X**  
675 **chromosome and autosomes of human and chimpanzee.** *Proc Natl Acad Sci U S A*  
676 2005, **102**:4063-4067.

- 677 5. Baines JF, Harr B: **Reduced X-linked diversity in derived populations of house mice.**  
678 *Genetics* 2007, **175**:1911-1921.
- 679 6. Mank JE, Hultin-Rosenberg L, Axelsson E, Ellegren H: **Rapid evolution of female-**  
680 **biased, but not male-biased, genes expressed in the avian brain.** *Molecular Biology*  
681 *and Evolution* 2007, **24**:2698-2706.
- 682 7. Mank JE, Nam K, Ellegren H: **Faster-Z evolution is predominantly due to genetic**  
683 **drift.** *Mol Biol Evol* 2010, **27**:661-670.
- 684 8. Sackton TB, Corbett-Detig RB, Nagaraju J, Vaishna L, Arunkumar KP, Hartl DL:  
685 **Positive selection drives faster-Z evolution in silkmoths.** *Evolution* 2014, **68**:2331-  
686 2342.
- 687 9. Jaquiere J, Peccoud J, Ouisse T, Legeai F, Prunier-Leterme N, Gouin A, Nouhaud P,  
688 Brisson JA, Bickel R, Purandare S, et al: **Disentangling the Causes for Faster-X**  
689 **Evolution in Aphids.** *Genome Biol Evol* 2018, **10**:507-520.
- 690 10. Bechsgaard J, Schou MF, Vanthournout B, Hendrickx F, Knudsen B, Settepani V,  
691 Schierup MH, Bilde T: **Evidence for Faster X Chromosome Evolution in Spiders.** *Mol*  
692 *Biol Evol* 2019, **36**:1281-1293.
- 693 11. Charlesworth B, Campos JL, Jackson BC: **Faster-X evolution: Theory and evidence**  
694 **from Drosophila.** *Mol Ecol* 2018, **27**:3753-3771.
- 695 12. Avila V, Marion de Proce S, Campos JL, Borthwick H, Charlesworth B, Betancourt AJ:  
696 **Faster-X effects in two Drosophila lineages.** *Genome Biol Evol* 2014, **6**:2968-2982.
- 697 13. Rousselle M, Faivre N, Ballenghien M, Galtier N, Nabholz B: **Hemizyosity Enhances**  
698 **Purifying Selection: Lack of Fast-Z Evolution in Two Satyrine Butterflies.** *Genome*  
699 *Biol Evol* 2016, **8**:3108-3119.
- 700 14. Pinharanda A, Rousselle M, Martin SH, Hanly JJ, Davey JW, Kumar S, Galtier N,  
701 Jiggins CD: **Sexually dimorphic gene expression and transcriptome evolution**  
702 **provide mixed evidence for a fast-Z effect in Heliconius.** *J Evol Biol* 2019, **32**:194-  
703 204.
- 704 15. Baines JF, Sawyer SA, Hartl DL, Parsch J: **Effects of X-linkage and sex-biased gene**  
705 **expression on the rate of adaptive protein evolution in Drosophila.** *Mol Biol Evol*  
706 2008, **25**:1639-1650.
- 707 16. Parsch J, Ellegren H: **The evolutionary causes and consequences of sex-biased gene**  
708 **expression.** *Nature reviews Genetics* 2013, **14**:83-87.
- 709 17. Assis R, Zhou Q, Bachtrog D: **Sex-biased transcriptome evolution in Drosophila.**  
710 *Genome Biol Evol* 2012, **4**:1189-1200.

- 711 18. Zhang Z, Hambuch TM, Parsch J: **Molecular evolution of sex-biased genes in**  
712 **Drosophila.** *Mol Biol Evol* 2004, **21**:2130-2139.
- 713 19. Kirkpatrick M, Hall DW: **Male-biased mutation, sex linkage, and the rate of adaptive**  
714 **evolution.** *Evolution* 2004, **58**:437-440.
- 715 20. Ranz JM, Castillo-Davis CI, Meiklejohn CD, Hartl DL: **Sex-dependent gene expression**  
716 **and evolution of the Drosophila transcriptome.** *Science* 2003, **300**:1742-1745.
- 717 21. Mank JE, Axelsson E, Ellegren H: **Fast-X on the Z: rapid evolution of sex-linked**  
718 **genes in birds.** *Genome Res* 2007, **17**:618-624.
- 719 22. Mank JE, Vicoso B, Berlin S, Charlesworth B: **Effective population size and the**  
720 **Faster-X effect: empirical results and their interpretation.** *Evolution* 2010, **64**:663-  
721 674.
- 722 23. Kayserili MA, Gerrard DT, Tomancak P, Kalinka AT: **An excess of gene expression**  
723 **divergence on the X chromosome in Drosophila embryos: implications for the**  
724 **faster-X hypothesis.** *PLoS Genet* 2012, **8**:e1003200.
- 725 24. Walters JR, Hardcastle TJ, Jiggins CD: **Sex Chromosome Dosage Compensation in**  
726 **Heliconius Butterflies: Global yet Still Incomplete?** *Genome Biol Evol* 2015, **7**:2545-  
727 2559.
- 728 25. Argyridou E, Parsch J: **Regulation of the X Chromosome in the Germline and Soma**  
729 **of Drosophila melanogaster Males.** *Genes (Basel)* 2018, **9**.
- 730 26. Meiklejohn CD, Presgraves DC: **Little evidence for demasculinization of the**  
731 **Drosophila X chromosome among genes expressed in the male germline.** *Genome*  
732 *Biol Evol* 2012, **4**:1007-1016.
- 733 27. Vibranovski MD, Lopes HF, Karr TL, Long M: **Stage-specific expression profiling of**  
734 **Drosophila spermatogenesis suggests that meiotic sex chromosome inactivation**  
735 **drives genomic relocation of testis-expressed genes.** *PLoS Genet* 2009, **5**:e1000731.
- 736 28. Stork NE, McBroom J, Gely C, Hamilton AJ: **New approaches narrow global species**  
737 **estimates for beetles, insects, and terrestrial arthropods.** *Proc Natl Acad Sci U S A*  
738 2015, **112**:7519-7523.
- 739 29. Brown SJ, Shippy TD, Miller S, Bolognesi R, Beeman RW, Lorenzen MD, Bucher G,  
740 Wimmer EA, Klingler M: **The red flour beetle, Tribolium castaneum (Coleoptera): a**  
741 **model for studies of development and pest biology.** *Cold Spring Harb Protoc* 2009,  
742 **2009**:pdb emo126.
- 743 30. Savard J, Marques-Souza H, Aranda M, Tautz D: **A segmentation gene in tribolium**  
744 **produces a polycistronic mRNA that codes for multiple conserved peptides.** *Cell*  
745 2006, **126**:559-569.

- 746 31. Denell R: **Establishment of tribolium as a genetic model system and its early**  
747 **contributions to evo-devo.** *Genetics* 2008, **180**:1779-1786.
- 748 32. Choe CP, Stellabotte F, Brown SJ: **Regulation and function of odd-paired in**  
749 **Tribolium segmentation.** *Dev Genes Evol* 2017, **227**:309-317.
- 750 33. Brown SJ, Hilgenfeld RB, Denell RE: **The beetle *Tribolium castaneum* has a fushi**  
751 **tarazu homolog expressed in stripes during segmentation.** *Proc Natl Acad Sci U S A*  
752 1994, **91**:12922-12926.
- 753 34. Wang L, Wang S, Li Y, Paradesi MS, Brown SJ: **BeetleBase: the model organism**  
754 **database for *Tribolium castaneum*.** *Nucleic Acids Res* 2007, **35**:D476-479.
- 755 35. Williford A, Demuth JP: **Gene expression levels are correlated with synonymous**  
756 **codon usage, amino acid composition, and gene architecture in the red flour beetle,**  
757 ***Tribolium castaneum*.** *Mol Biol Evol* 2012, **29**:3755-3766.
- 758 36. Tribolium Genome Sequencing C, Richards S, Gibbs RA, Weinstock GM, Brown SJ,  
759 Denell R, Beeman RW, Gibbs R, Beeman RW, Brown SJ, et al: **The genome of the**  
760 **model beetle and pest *Tribolium castaneum*.** *Nature* 2008, **452**:949-955.
- 761 37. Angelini DR, Jockusch EL: **Relationships among pest flour beetles of the genus**  
762 ***Tribolium* (Tenebrionidae) inferred from multiple molecular markers.** *Mol*  
763 *Phylogenet Evol* 2008, **46**:127-141.
- 764 38. Prince EG, Kirkland D, Demuth JP: **Hyperexpression of the X chromosome in both**  
765 **sexes results in extensive female bias of X-linked genes in the flour beetle.** *Genome*  
766 *Biol Evol* 2010, **2**:336-346.
- 767 39. Khan SA, Eggleston H, Myles K, Adelman Z: **Differentially and Co-expressed Genes**  
768 **in Embryo, Germ-Line and Somatic Tissues of *Tribolium castaneum*.** *G3 (Bethesda)*  
769 2019.
- 770 40. Meisel RP: **Towards a more nuanced understanding of the relationship between sex-**  
771 **biased gene expression and rates of protein-coding sequence evolution.** *Mol Biol Evol*  
772 2011, **28**:1893-1900.
- 773 41. Grath S, Parsch J: **Rate of amino acid substitution is influenced by the degree and**  
774 **conservation of male-biased transcription over 50 myr of *Drosophila* evolution.**  
775 *Genome Biology and Evolution* 2012, **4**:346-359.
- 776 42. Perry JC, Harrison PW, Mank JE: **The Ontogeny and Evolution of Sex-Biased Gene**  
777 **Expression in *Drosophila melanogaster*.** *31* 2015, **5**:1206-1219.
- 778 43. Yang Z: **PAML 4: phylogenetic analysis by maximum likelihood.** *Molecular Biology*  
779 *and Evolution* 2007, **24**:1586-1591.

- 780 44. Love MI, Huber W, Anders S: **Moderated estimation of fold change and dispersion**  
781 **for RNA-seq data with DESeq2.** *Genome Biol* 2014, **15**:550.
- 782 45. Huang da W, Sherman BT, Lempicki RA: **Systematic and integrative analysis of large**  
783 **gene lists using DAVID bioinformatics resources.** *Nature Protocols* 2009, **4**:44-57.
- 784 46. Vainio S, Heikkila M, Kispert A, Chin N, McMahon AP: **Female development in**  
785 **mammals is regulated by Wnt-4 signalling.** *Nature* 1999, **397**:405-409.
- 786 47. Hernandez Gifford JA: **The role of WNT signaling in adult ovarian folliculogenesis.**  
787 *Reproduction* 2015, **150**:R137-148.
- 788 48. Naillat F, Yan W, Karjalainen R, Liakhovitskaia A, Samoylenko A, Xu Q, Sun Z, Shen  
789 B, Medvinsky A, Quaggin S, Vainio SJ: **Identification of the genes regulated by Wnt-**  
790 **4, a critical signal for commitment of the ovary.** *Exp Cell Res* 2015, **332**:163-178.
- 791 49. Kim-Yip RP, Nystul TG: **Wingless promotes EGFR signaling in follicle stem cells to**  
792 **maintain self-renewal.** *Development* 2018, **145**.
- 793 50. Bothun AM, Woods DC: **Dynamics of WNT signaling components in the human**  
794 **ovary from development to adulthood.** *Histochem Cell Biol* 2019, **151**:115-123.
- 795 51. Wang X, Page-McCaw A: **Wnt6 maintains anterior escort cells as an integral**  
796 **component of the germline stem cell niche.** *Development* 2018, **145**.
- 797 52. Dai W, Peterson A, Kenney T, Burrous H, Montell DJ: **Quantitative microscopy of the**  
798 **Drosophila ovary shows multiple niche signals specify progenitor cell fate.** *Nat*  
799 *Commun* 2017, **8**:1244.
- 800 53. Chen X, Ma C, Chen C, Lu Q, Shi W, Liu Z, Wang H, Guo H: **Integration of lncRNA-**  
801 **miRNA-mRNA reveals novel insights into oviposition regulation in honey bees.**  
802 *PeerJ* 2017, **5**:e3881.
- 803 54. Mottier-Pavie VI, Palacios V, Eliazar S, Scoggin S, Buszczak M: **The Wnt pathway**  
804 **limits BMP signaling outside of the germline stem cell niche in Drosophila ovaries.**  
805 *Dev Biol* 2016, **417**:50-62.
- 806 55. Wang S, Gao Y, Song X, Ma X, Zhu X, Mao Y, Yang Z, Ni J, Li H, Malanowski KE, et  
807 al: **Wnt signaling-mediated redox regulation maintains the germ line stem cell**  
808 **differentiation niche.** *Elife* 2015, **4**:e08174.
- 809 56. Dean R, Mank JE: **Tissue Specificity and Sex-Specific Regulatory Variation Permit**  
810 **the Evolution of Sex-Biased Gene Expression.** *The American Naturalist* 2016,  
811 **188**:E74-E84.
- 812 57. Mank JE, Ellegren H: **Are sex-biased genes more dispensable?** *Biology Letters* 2009,  
813 **5**:409-412.

- 814 58. Akoglu H: **User's guide to correlation coefficients.** *Turk J Emerg Med* 2018, **18**:91-93.
- 815 59. Vicoso B, Bachtrog D: **Progress and prospects toward our understanding of the**  
816 **evolution of dosage compensation.** *Chromosome Res* 2009, **17**:585-602.
- 817 60. Mahajan S, Bachtrog D: **Partial dosage compensation in Strepsiptera, a sister group**  
818 **of beetles.** *Genome Biol Evol* 2015, **7**:591-600.
- 819 61. Kemkemer C, Catalan A, Parsch J: **'Escaping' the X chromosome leads to increased**  
820 **gene expression in the male germline of Drosophila melanogaster.** *Heredity (Edinb)*  
821 2014, **112**:149-155.
- 822 62. Yang X, Schadt EE, Wang S, Wang H, Arnold AP, Ingram-Drake L, Drake TA, Lusk  
823 AJ: **Tissue-specific expression and regulation of sexually dimorphic genes in mice.**  
824 *Genome Res* 2006, **16**:995-1004.
- 825 63. Vawter MP, Evans S, Choudary P, Tomita H, Meador-Woodruff J, Molnar M, Li J,  
826 Lopez JF, Myers R, Cox D, et al: **Gender-specific gene expression in post-mortem**  
827 **human brain: localization to sex chromosomes.** *Neuropsychopharmacology* 2004,  
828 **29**:373-384.
- 829 64. Saifi GM, Chandra HS: **An apparent excess of sex- and reproduction-related genes on**  
830 **the human X chromosome.** *Proc Biol Sci* 1999, **266**:203-209.
- 831 65. Meisel RP, Malone JH, Clark AG: **Disentangling the relationship between sex-biased**  
832 **gene expression and X-linkage.** *Genome Res* 2012, **22**:1255-1265.
- 833 66. Vibranovski MD, Zhang YE, Kemkemer C, Lopes HF, Karr TL, Long M: **Re-analysis of**  
834 **the larval testis data on meiotic sex chromosome inactivation revealed evidence for**  
835 **tissue-specific gene expression related to the drosophila X chromosome.** *BMC Biol*  
836 2012, **10**:49; author reply 50.
- 837 67. Turner JM: **Meiotic sex chromosome inactivation.** *Development* 2007, **134**:1823-1831.
- 838 68. Bean CJ, Schaner CE, Kelly WG: **Meiotic pairing and imprinted X chromatin**  
839 **assembly in Caenorhabditis elegans.** *Nat Genet* 2004, **36**:100-105.
- 840 69. Orr HA, Betancourt AJ: **Haldane's sieve and adaptation from the standing genetic**  
841 **variation.** *Genetics* 2001, **157**:875-884.
- 842 70. Whittle CA, Extavour CG: **Selection shapes turnover and magnitude of sex-biased**  
843 **expression in Drosophila gonads.** *BMC Evolutionary Biology* 2019, **In press**.
- 844 71. Reinke V, Gil IS, Ward S, Kazmer K: **Genome-wide germline-enriched and sex-biased**  
845 **expression profiles in Caenorhabditis elegans.** *Development* 2004, **131**:311-323.
- 846 72. Langdon WB: **Performance of genetic programming optimised Bowtie2 on genome**  
847 **comparison and analytic testing (GCAT) benchmarks.** *BioData Min* 2015, **8**:1.



- 848 73. Whittle CA, Extavour CG: **Rapid Evolution of Ovarian-Biased Genes in the Yellow**  
849 **Fever Mosquito (*Aedes aegypti*)**. *Genetics* 2017, **206**:2119-2137.
- 850 74. Kumar S, Stecher G, Peterson D, Tamura K: **MEGA-CC: computing core of molecular**  
851 **evolutionary genetics analysis program for automated and iterative data analysis**.  
852 *Bioinformatics* 2012, **28**:2685-2686.
- 853 75. Talavera G, Castresana J: **Improvement of phylogenies after removing divergent and**  
854 **ambiguously aligned blocks from protein sequence alignments**. *Systematic Biology*  
855 2007, **56**:564-577.
- 856 76. Castresana J: **Selection of conserved blocks from multiple alignments for their use in**  
857 **phylogenetic analysis**. *Mol Biol Evol* 2000, **17**:540-552.
- 858 77. Shukla JN, Palli SR: **Production of all female progeny: evidence for the presence of**  
859 **the male sex determination factor on the Y chromosome**. *J Exp Biol* 2014, **217**:1653-  
860 1655.
- 861 78. Gramates LS, Marygold SJ, Santos GD, Urbano JM, Antonazzo G, Matthews BB, Rey  
862 AJ, Tabone CJ, Crosby MA, Emmert DB, et al: **FlyBase at 25: looking to the future**.  
863 *Nucleic Acids Res* 2016.
- 864 79. Hoff KJ, Stanke M: **WebAUGUSTUS--a web service for training AUGUSTUS and**  
865 **predicting genes in eukaryotes**. *Nucleic Acids Res* 2013, **41**:W123-128.
- 866 80. Min XJ, Butler G, Storms R, Tsang A: **OrfPredictor: predicting protein-coding**  
867 **regions in EST-derived sequences**. *Nucleic Acids Res* 2005, **33**:W677-680.
- 868



**Table 1.** Gene ontology (GO) clustering of ovary-biased genes located on the X chromosomes and on autosomes. The top clusters with the greatest enrichment scores are shown per category. *P*-values are from a modified Fisher's test, wherein lower values indicate greater enrichment. Data is from DAVID software [45] using those genes with *D. melanogaster* orthologs.

| <b>Ovary-Biased Genes on X Chromosome</b>      |                | <b>Ovary-Biased Genes on Autosomes<sup>a</sup></b>        |                |
|------------------------------------------------|----------------|-----------------------------------------------------------|----------------|
| <b><u>Cluster 1: Enrichment Score 3.09</u></b> | <b>P-value</b> | <b><u>Cluster 1: Enrichment Score 3.56</u></b>            | <b>P-value</b> |
| Wnt signaling pathway                          | 4.20E-06       | Metal-binding                                             | 6.00E-05       |
| Segmentation polarity protein                  | 8.20E-05       | Zinc ion binding                                          | 5.50E-04       |
| Regulation of Wnt signaling pathway            | 1.60E-04       | Zinc-finger                                               | 6.60E-04       |
| Segment polarity determination                 | 1.30E-03       |                                                           |                |
| Ovarian follicle cell development              | 6.70E-03       | <b><u>Cluster 2: Enrichment Score 2.81</u></b>            |                |
| Somatic stem cell population maintenance       | 2.50E-02       | Pleckstrin homology-like domain, signalling               | 1.80E-04       |
| Heart development                              | 3.90E-02       | Pleckstrin homology domain, signalling                    | 4.90E-04       |
|                                                |                |                                                           |                |
| <b><u>Cluster 2: Enrichment Score 2.92</u></b> |                | <b><u>Cluster 3: Enrichment Score: 2.78</u></b>           |                |
| ATP-binding                                    | 2.00E-04       | SH2 domain, oncoproteins, signalling                      | 1.40E-04       |
| Nucleotide-binding                             | 3.70E-04       | SH3 domain, intracellular or membrane-associated proteins | 2.10E-04       |
| Nucleotide phosphate-binding region:ATP        | 1.60E-03       |                                                           |                |
| Protein kinase, ATP binding site               | 7.70E-03       |                                                           |                |

<sup>a</sup> Data was pooled for all nine autosomes and also includes genes yet unmapped in the genome.

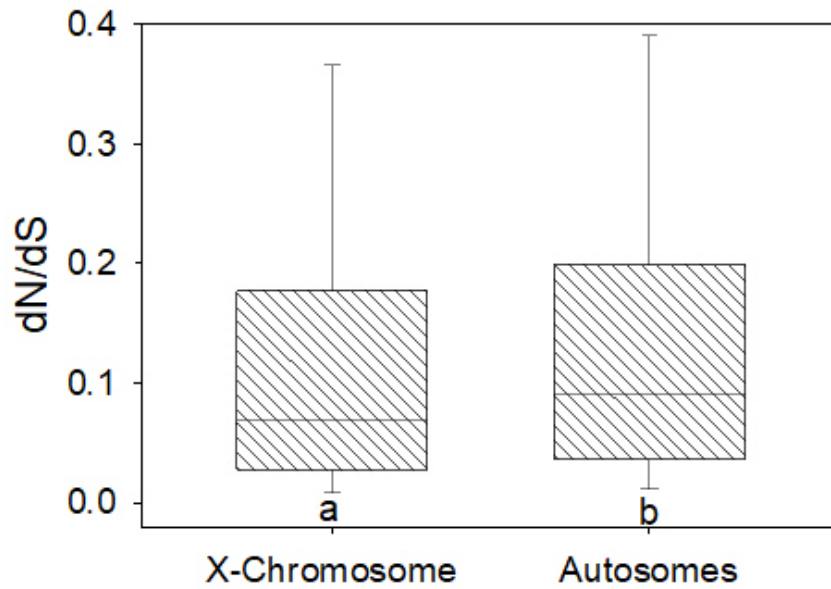

A. Box plot of dN/dS for X-chromosome and autosomes

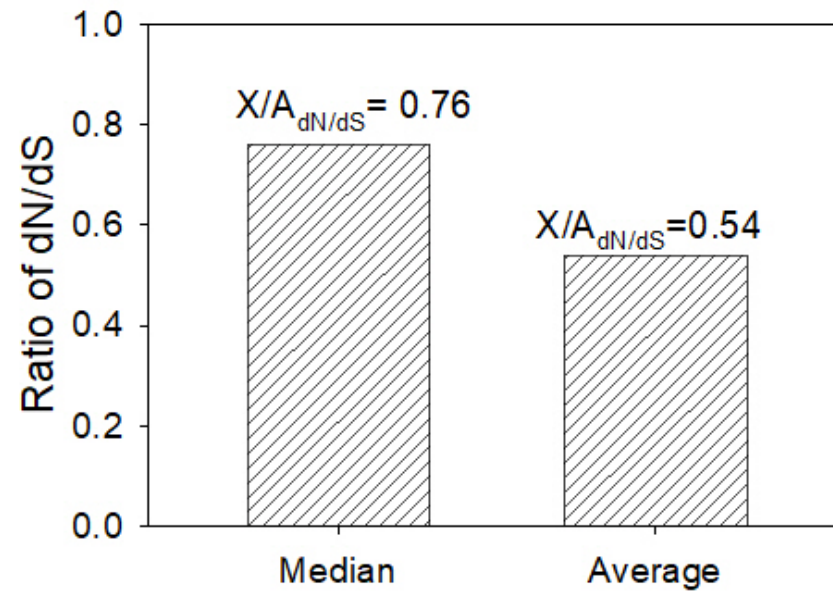

B. Ratio of dN/dS of the X-chromosome to autosomes

**Fig. 1. The dN/dS of genes located on the X-chromosome versus autosomes.** A) Box plots of dN/dS showing the median, upper and lower quartiles, and 95/5th percentiles; B) the ratio of dN/dS for the X-chromosome versus the autosomes using the median and mean values per group. Different letters under bars in panel A indicate a statistically significant difference using MWU-tests.

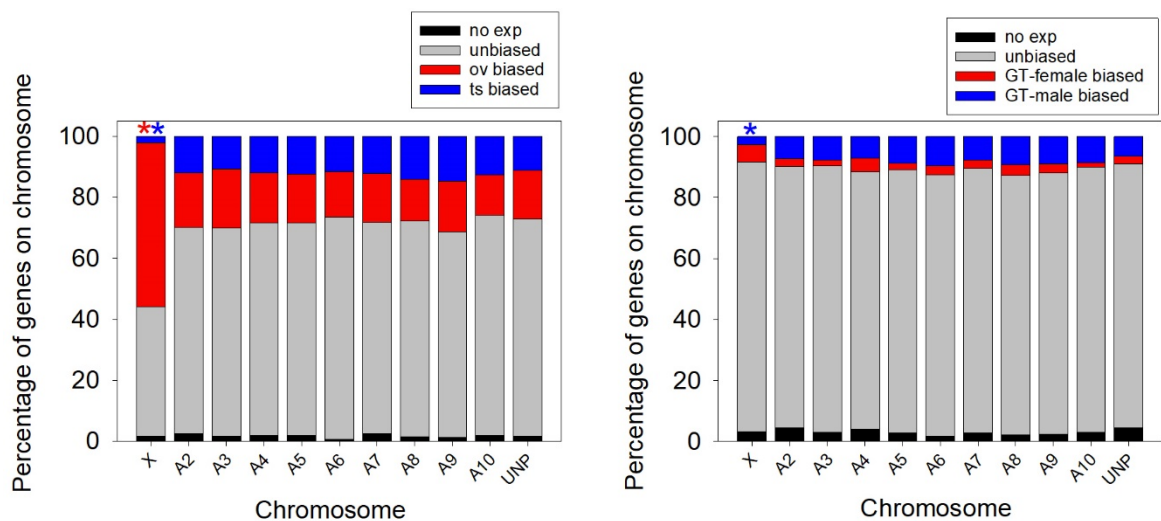

bioRxiv preprint doi: <https://doi.org/10.1101/754903>; this version posted September 9, 2019. The copyright holder for this preprint (which was not certified by peer review) is the author/funder, who has granted bioRxiv a license to display the preprint in perpetuity. It is made available under aCC-BY-NC-ND 4.0 International license.

**A. Frequency of gonadally-biased genes on the X-chromosome and autosomes** **B. Frequency of GT-soma-biased genes on the X-chromosome and autosomes**

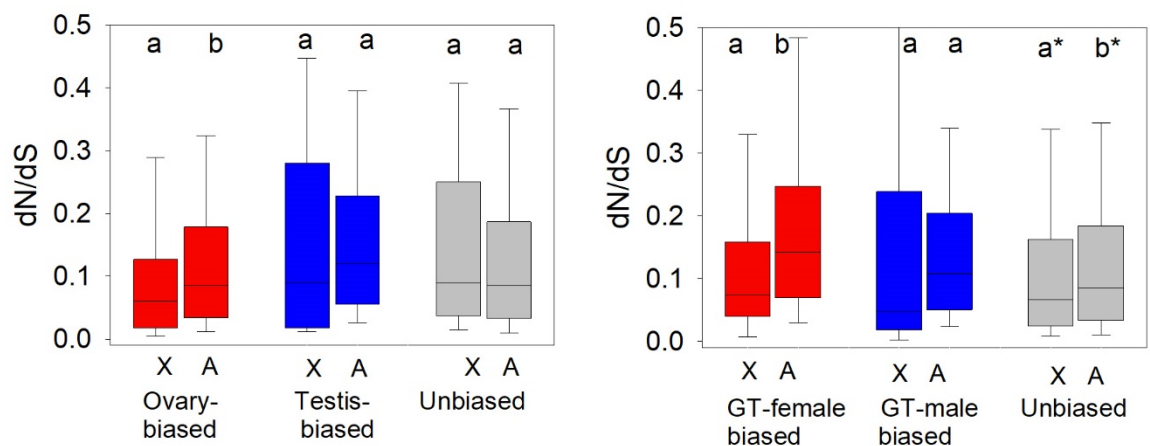

**C. dN/dS of gonadally-biased genes (X= X-chromosome, A= autosomes)**

**D. dN/dS of GT-soma biased genes (X= X-chromosome, A= autosomes)**

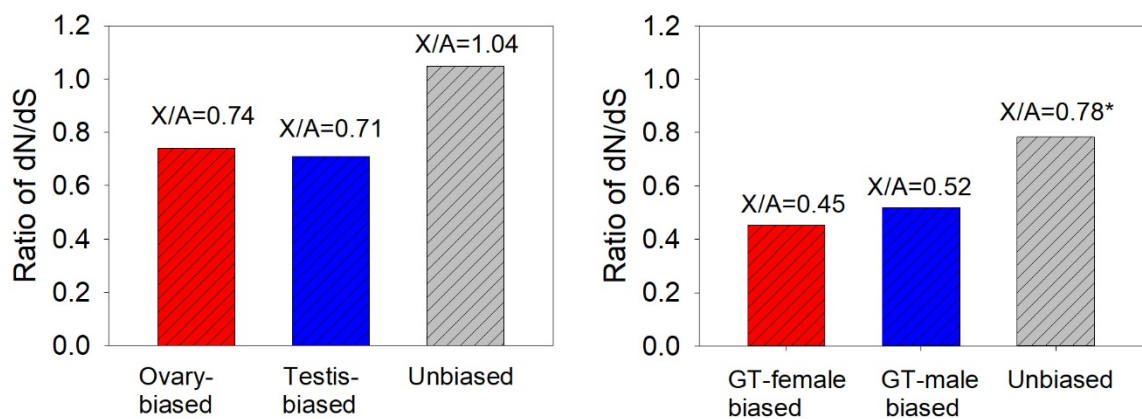

**E. Ratio of dN/dS of autosomes to the X-chromosome for gonadally biased genes**

**F. Ratio of dN/dS of autosomes to the X-chromosome for GT-soma biased genes**

**Fig. 2. Assessment of the faster-X effect with respect to sex-biased genes in *T. castaneum*.** A) The frequency of gonadally sex-biased genes on the X chromosome and nine autosomes for the 7,751 genes under study; B) the frequency for GT-soma sex-biased genes; C) the dN/dS of ovary-biased, testis-biased and unbiased genes on the X-chromosome and autosomes; D) the dN/dS of GT-male biased, GT-female biased, and GT-unbiased genes on the X-chromosome and autosomes; E) the ratio of the median dN/dS of the X chromosome to the autosomes ( $X/A_{dN/dS}$ ) for all three categories of sex-biased expression for the gonads; and F) for the GT-soma. In A, the red and blue asterisks indicate more ovary-biased and fewer testis-biased (or GT-male biased in B) genes were located on the X-chromosomes than on pooled autosomes ( $\chi^2$ -P with Yate's correction  $P < 0.05$  for each contrast). Different lowercase letters on top of each pair of bars in C and D indicate MWU-test  $P < 0.05$ . In C-F, unmapped genes were included with autosomal genes and their inclusion in or exclusion from the analysis yielded similar results. Unbiased genes included those with no detectable expression. \*Note that differences in X-linked and autosomal unbiased genes in panel D and F are explained by ovary-biased genes (Table S2) as outlined in the main text. After removal of ovary-biased genes  $X/A_{dN/dS} = 1.04$  for GT-unbiased genes.

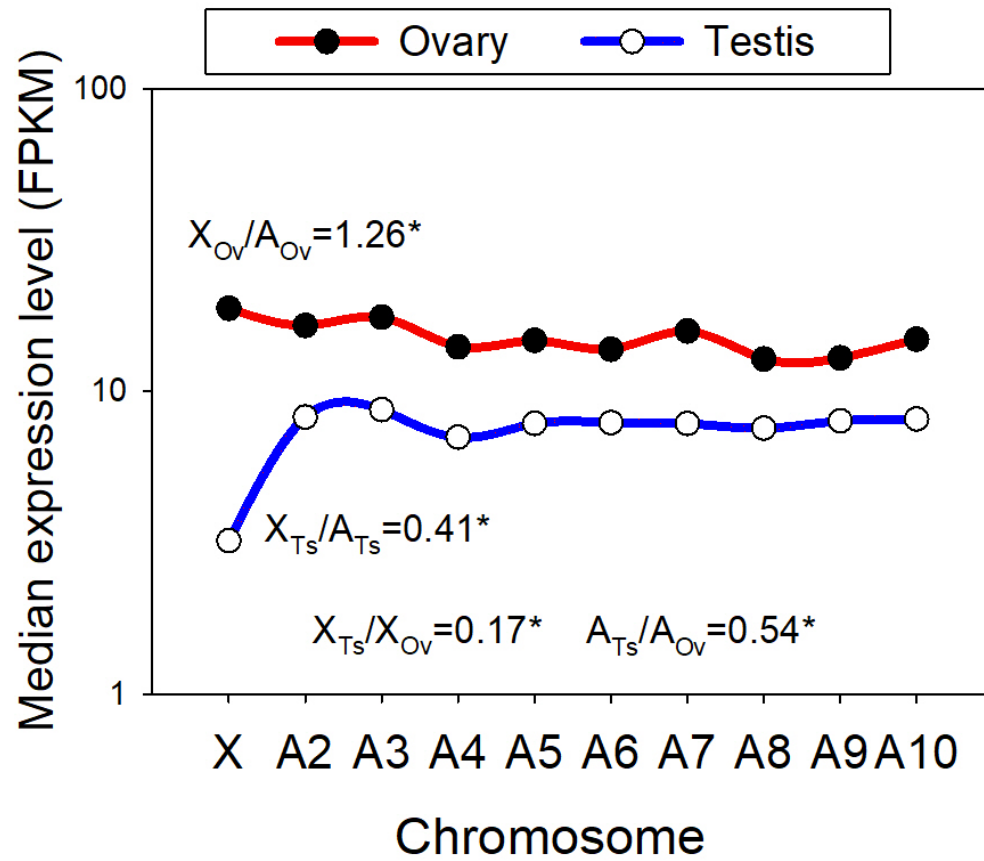

A. Median expression in gonads

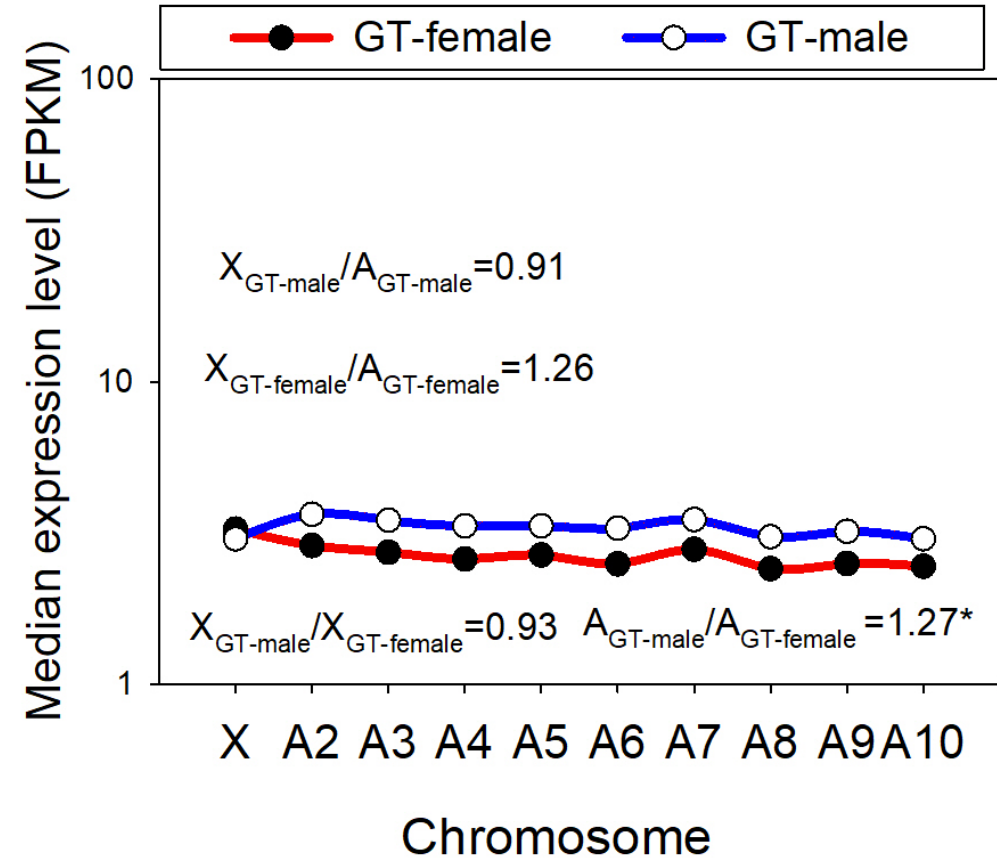

B. Median expression in GT-soma

**Fig. 3. Median expression in the male and female tissues on each of the ten chromosomes in *T. castaneum* for all genes under study** A) Gonads; B) GT-soma. For panel A, the ratio of median expression on the X chromosome (X) and autosomes (A) for testis-biased genes and for ovary-biased genes are shown ( $X_{Ts}/A_{Ts}$  and  $X_{Ov}/A_{Ov}$ ). Also shown are  $X_{Ts}/X_{Ov}$  and  $A_{Ts}/A_{Ov}$ . Panel B contains the equivalent results for the GT-soma. \*Indicates a statistically significant difference between the two groups contained in each ratio using MWU-tests.

## **ADDITIONAL FILE 1**

### **Absence of a faster-X effect in beetles (*Tribolium*, Coleoptera)**

Carrie A. Whittle, Arpita Kulkarni, Cassandra G. Extavour

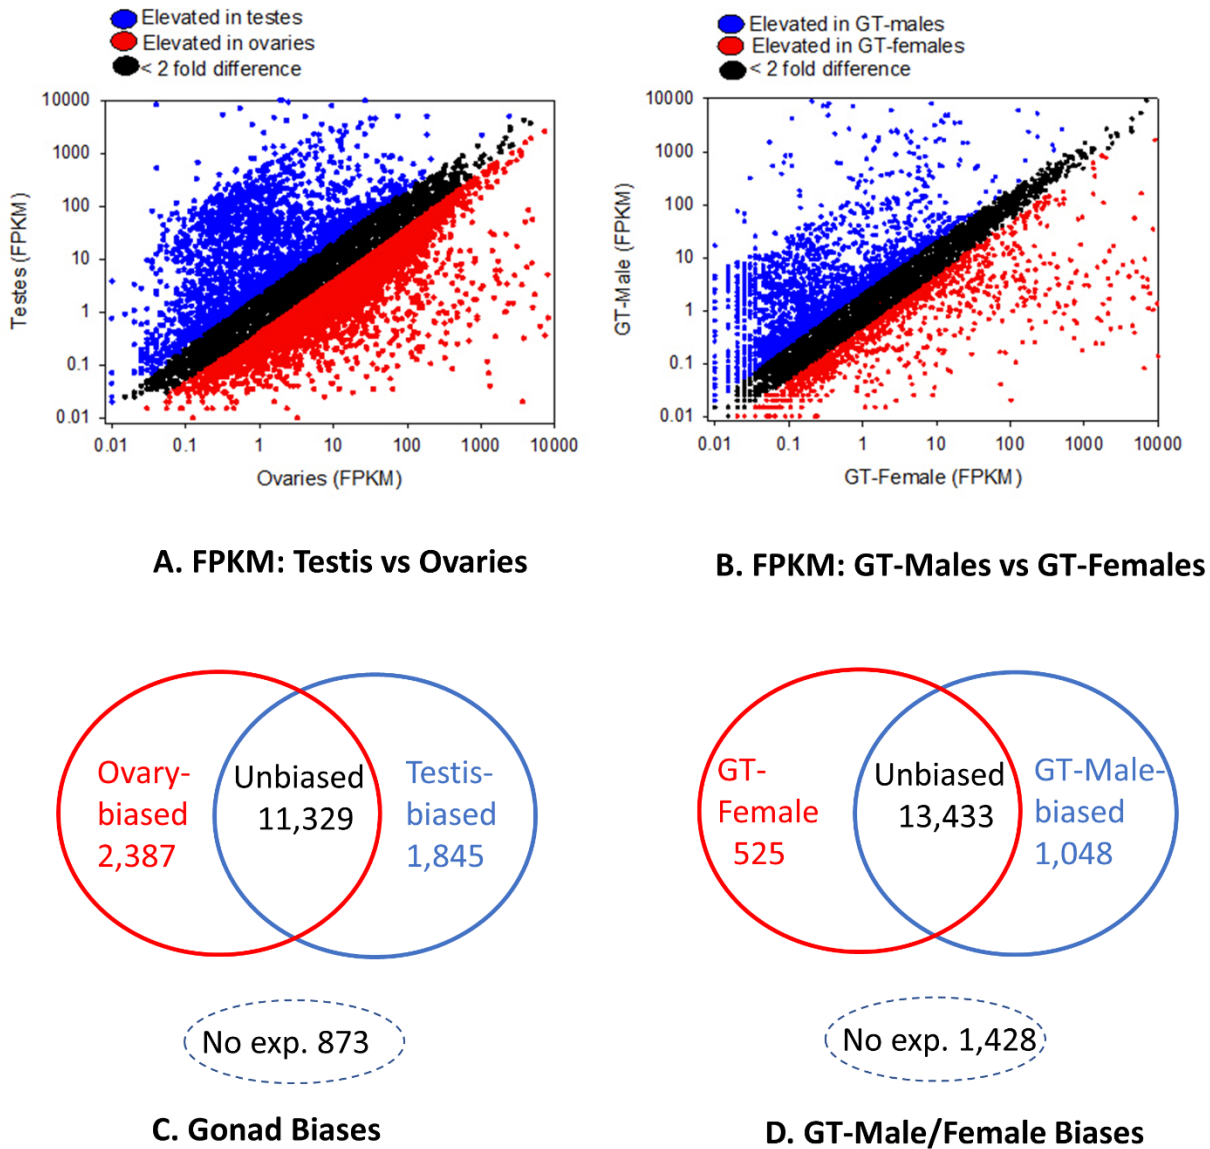

**Fig. S1. Sex-biased expression in 16,434 genes of *T. castaneum*.** A) Expression level (FPKM) in the testes versus ovaries; B) expression level (FPKM) in GT-males versus GT-females; C) Venn diagram of sex-biased expression the gonads and; D) Venn diagram of sex-biased gene expression in the GT-soma. In A and B, all genes are shown and those with two-fold or greater difference in expression in the male and female tissues are in blue and red respectively (those statistically significant in C and D). Genes with no expression in both tissues were excluded in A and B and are shown in C and D (No exp.).

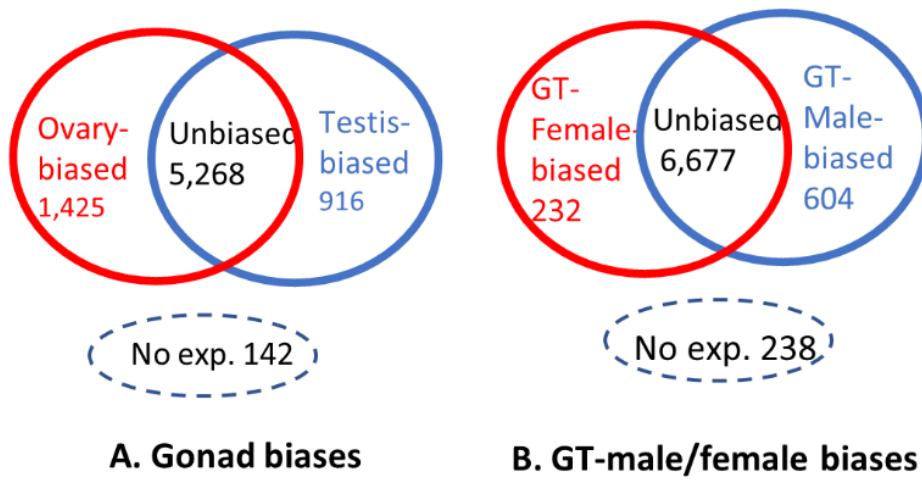

**Fig. S2.** A Venn diagram showing the number of sex-biased and unbiased genes in the A) gonads; B) GT-soma.



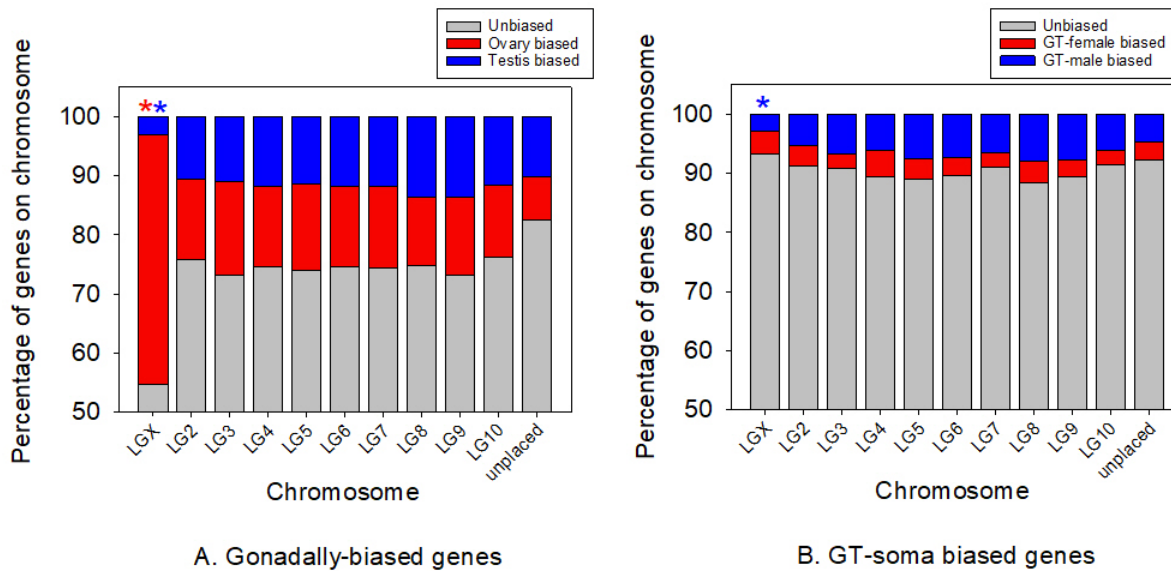

**Fig. S3.** The frequency of sex-biased genes and unbiased genes on the X chromosome and autosome when all 16,434 genes of *T. castenum* are included in assessment. A) Gonadally biased genes; B) GT-soma biased genes. In A, the red and blue asterisks indicate more ovary-biased and fewer testis- (or fewer GT-male biased in B) biased genes respectively on the X-chromosomes than on pooled autosomes (Chi<sup>2</sup>-P with Yate's correction P<0.05 for each contrast).

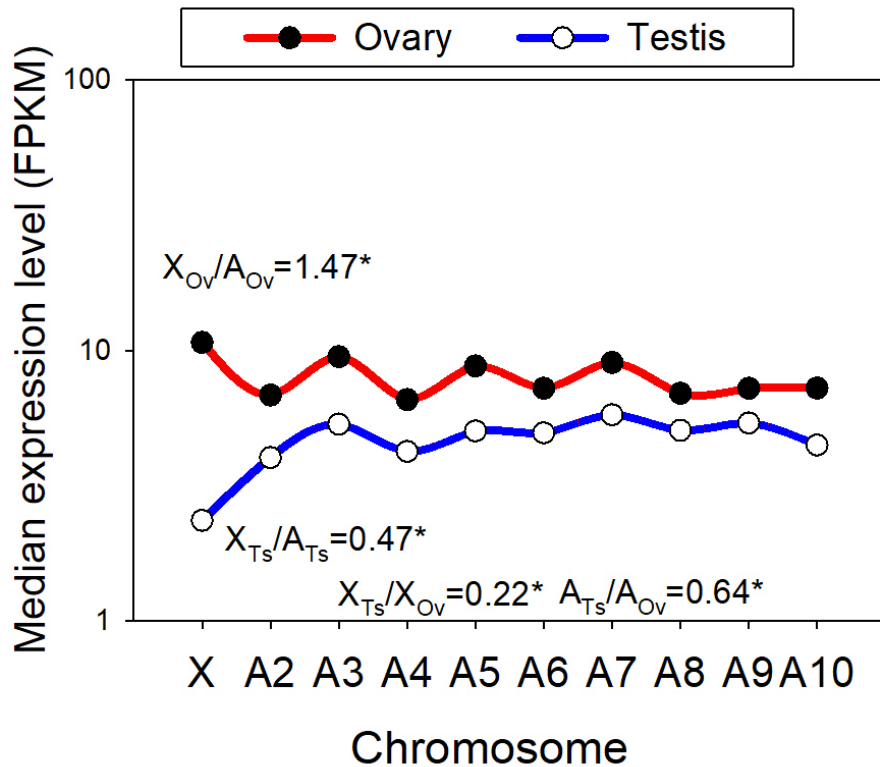

A. Median expression in gonads  
(all 16,434 genes)

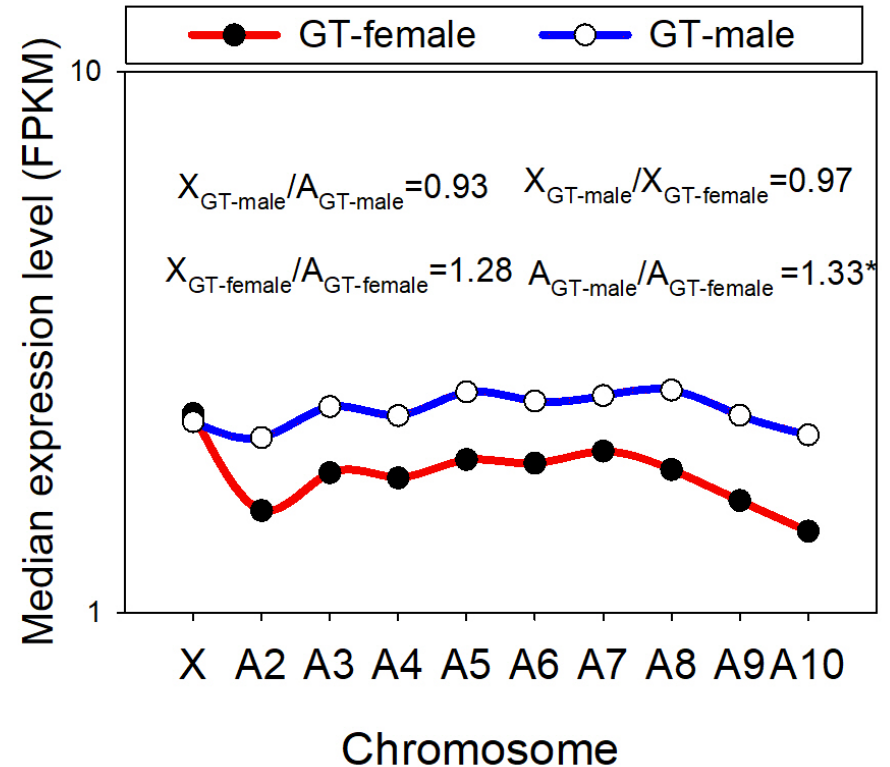

B. Median expression in GT-soma  
(all 16,434 genes)

**Fig. S4. Median expression in the male and female tissues on each of the ten chromosomes in *T. castaneum* using all 16,434 genes in the genome.** A) Gonads; B) GT-soma. For panel A, the ratio of median expression on the X chromosome (X) and autosomes (A) for testis-biased genes and for ovary-biased genes are shown ( $X_{TS}/A_{TS}$  and  $X_{OV}/A_{OV}$ ). Also shown are  $X_{TS}/X_{OV}$  and  $A_{TS}/A_{OV}$ . Panel B contains the equivalent results for the GT-soma. Unmapped genes on chromosomes were excluded. \*Indicates a statistically significant difference between the two groups contained in each ratio using MWU-tests.

**Table S1.** RNA-seq data used in present study before and after adapter and quality trimming with BBDuk (<https://jgi.doe.gov/data-and-tools/bbtools/>). The Short Read Archive (SRA) Biosample identifiers are also shown (<https://www.ncbi.nlm.nih.gov/sra>).

---

| Species Sample <sup>a</sup> | No. of Reads    |                | SRA Biosample ID |
|-----------------------------|-----------------|----------------|------------------|
|                             | Before trimming | After trimming |                  |
| <i>Tribolium castaneum</i>  |                 |                |                  |
| Testes sample 1             | 18,006,255      | 17,995,655     | SAMN12702873     |
| Ovary sample 1              | 39,140,493      | 39,122,050     | SAMN12702874     |
| GT-male sample 1            | 25,630,261      | 25,609,723     | SAMN12702875     |
| GT-female sample 1          | 41,513,717      | 41,472,348     | SAMN12702876     |
| Testes sample 2             | 24,795,583      | 24,787,238     | SAMN12702877     |
| Ovary sample 2              | 22,306,622      | 22,286,961     | SAMN12702878     |
| GT-male sample 2            | 62,781,001      | 62,712,242     | SAMN12702879     |
| GT-female 2                 | 52,275,340      | 52,211,149     | SAMN12702880     |
| <i>Tribolium freemani</i>   |                 |                |                  |
| Testes sample 1             | 32,222,092      | 32,203,312     | SAMN12702881     |
| Ovary sample 1              | 40,395,198      | 40,368,671     | SAMN12702882     |
| GT-male sample 1            | 32,933,858      | 32,926,509     | SAMN12702883     |
| GT-female sample 1          | 33,163,960      | 33,147,066     | SAMN12702884     |

---

<sup>a</sup> Reads were obtained from for two RNA-seq runs of each biological sample.

**Table S2. A.** The number of studied genes (N=7,751) with sex-biased expression in the gonads and GT-soma. **B.** The degree of overlap in sex-biased status on the X-linked genes between the gonads and GT-soma are also shown.

**A**

|           | <b>N values gonads</b> |               |                       |       |           | <b>N values GT-soma</b> |                |                          |       |
|-----------|------------------------|---------------|-----------------------|-------|-----------|-------------------------|----------------|--------------------------|-------|
|           | Ovary-biased           | Testis-biased | Unbiased <sup>a</sup> | Total |           | GT-female biased        | GT-male biased | GT-unbiased <sup>a</sup> | Total |
| X-linked  | 233                    | 9             | 190                   | 432   | X-linked  | 24                      | 12             | 396                      | 432   |
| Autosomes | 1192                   | 907           | 5220                  | 7319  | Autosomes | 208                     | 592            | 6519                     | 7319  |
|           |                        |               |                       | 7751  |           |                         |                |                          | 7751  |

<sup>a</sup>Includes sexually unbiased genes and those with no expression in Fig. S2.

**B**

| <b>Overlap on the X-Chromosome</b> | <b>N overlap in sex-biased status on the X-chromosome</b> |
|------------------------------------|-----------------------------------------------------------|
| Ovary-biased and GT-female biased  | 17                                                        |
| Testis-biased and GT-male biased   | 0                                                         |
| Ovary-biased and GT-unbiased       | 213                                                       |
| Testis-biased and GT-unbiased      | 7                                                         |
| GT-male biased and ovary-biased    | 3                                                         |

## Text File S1. Additional Methods

### Lab procedures

The gonads and other elements of the reproductive system were dissected as a single unit in ice cold 1x Phosphate Buffer Saline (PBS) and transferred immediately into TRIzol in a vial kept on dry ice. The reproductive tissues of males included the testes, accessory glands (mesadenia, ectadenia), vesicular seminalis, vas deferens and ejaculatory duct. The reproductive tissues for females included the ovaries, spermathecal gland, common oviduct, spermathecae, and vagina. All remaining nongonadal tissues of the adult body were collected and defined as GT-males and GT-females. Two biological samples per tissue type (testis, ovary, GT-males, GT-females) were collected for RNA-seq for our main target species for study, *T. castaneum* (eight total samples) while one sample per tissue type was obtained for *T. freemani* (four samples). A total of twelve samples were thus obtained for RNA-seq as shown in Table S1.

The testes, ovaries, GT-males and GT-females were stored in separate vials at -80°C until RNA extraction. RNA-isolation was performed according to the Ambion Life Technologies TRIzol Reagent Protocol, following which the RNA was used for RNA library preparation. Polyadenylated mRNAs were selected from total RNA samples using oligo-dT-conjugated magnetic beads on an Apollo324 automated workstation (PrepX PolyA mRNA isolation kit, Takara Bio USA). Entire poly-adenylated RNA samples were immediately converted into stranded Illumina sequencing libraries using 200 base pair (bp) fragmentation and sequential adapter addition on an Apollo324 automated workstation following manufacturer's specifications (PrepX RNA-seq for Illumina Library kit, Takara Bio USA). Libraries were enriched and indexed using 14 cycles of amplification (LongAmp Taq 2x MasterMix, New England BioLabs Inc.) with PCR primers that included a 6bp index sequence to allow for multiplexing (custom oligo order from Integrated DNA Technologies). Excess PCR reagents were removed using magnetic bead-based cleanup on an Apollo324 automated workstation (PCR Clean DX beads, Aline Biosciences). Resulting libraries were assessed using a 2200 TapeStation (Agilent Technologies) and quantified by QPCR (Kapa Biosystems). Libraries were pooled and sequenced on two Illumina NextSeq 500 high output flow cells using single end, 75bp reads.

## Extracting CDS from *T. freemani*

To extract gene sequences from scaffolds in this species we used Web Augustus version 3.3.1 (<http://bioinf.uni-greifswald.de/webaugustus/> [79]) that was trained to the *T. castaneum* genome and set at default parameters with the option to identify full length genes. The Augustus-generated CDS list for *T. freemani* was then assessed in ORF predictor, using its downloadable Perl script [80] to identify the highest quality reading frame per sequence. In ORF predictor, we employed the option to include the best-hit (lowest e-value) BLASTX alignment (conducted in BLAST+ v2.7.1, <https://blast.ncbi.nlm.nih.gov>) of *T. freemani* CDS versus the reference *T. castaneum* protein database to define reading frames, an approach which yielded 12,432 uninterrupted sequences of full or partial CDS for *T. freemani*. For further stringency in curating the *T. freemani* CDS list, we pooled the identified CDS with all 138,645,558 *T. freemani* RNA-seq reads (trimmed reads, Table S1) across all four tissue types (testis, ovaries, male carcass, female carcass) and mapped all sequences to the known and annotated CDS from *T. castaneum* using Geneious (v11.0.3), which generated consensus CDS. We then extracted CDS wherein all bases had a minimum of 10X coverage, and these were trimmed to the *T. castaneum* reference CDS. In those *T. freemani* CDS (obtained after ORF predictor) wherein the CDS was improved in quality (contained no unknown or ambiguous nucleotides) or in its length and/or the terminal stop codon was added by using the RNA-seq data, which occurred for N=1,249 CDS, we replaced the original Augustus-based CDS (among the 12,432) with the latter RNA-seq-mapped version CDS. Original CDS that were identified in *T. freemani* (and not found in the 12,432 list) only after using the RNA-seq mapping approach (N=196) were also included in the species final CDS list.
